# Supplementary material for: The effect of fluorination on the low and high frequency dielectric constants of non-polymeric organic semiconductors – towards homojunction solar cells
Source: Royal Society of Chemistry journal article supplement (doi:10.1039/d3tc02740f), 2023-01-01
Supplement: d3tc02740f1.pdf [file d3tc02740f1.pdf]

## Supporting Information

### The effect of fluorination on the low and high frequency dielectric constants of non-polymeric organic semiconductors – towards homojunction solar cells

Neil Mallo, Shaun McAnally, Ronan Chu, Mohammad Babazadeh, Hui Jin, Paul L. Burn,\* Ian R. Gentle, Paul E. Shaw\*

Centre for Organic Photonics & Electronics, School of Chemistry and Molecular Biosciences, The University of Queensland, Queensland 4072, Australia

\*p.burn2@uq.edu.au, p.shaw3@uq.edu.au

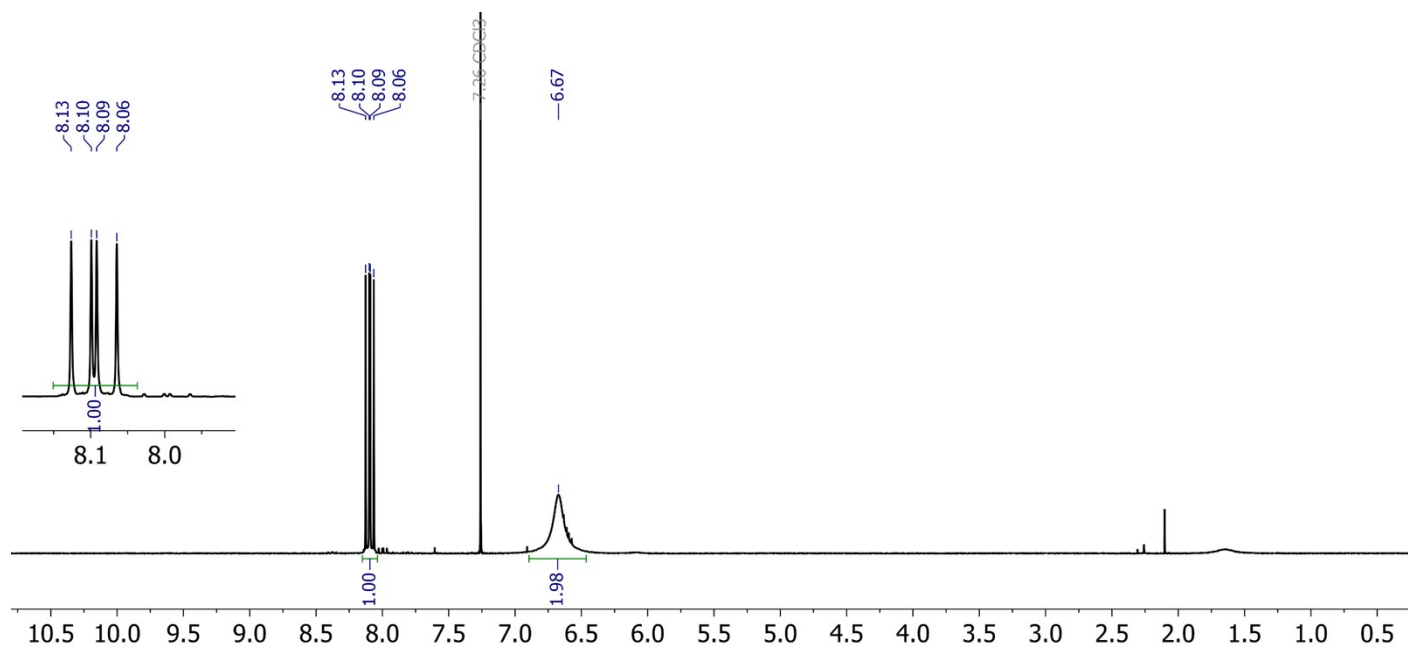

**Figure S1.**  $^1\text{H}$  NMR (300 MHz,  $\text{CDCl}_3$ ) spectrum of **2**.

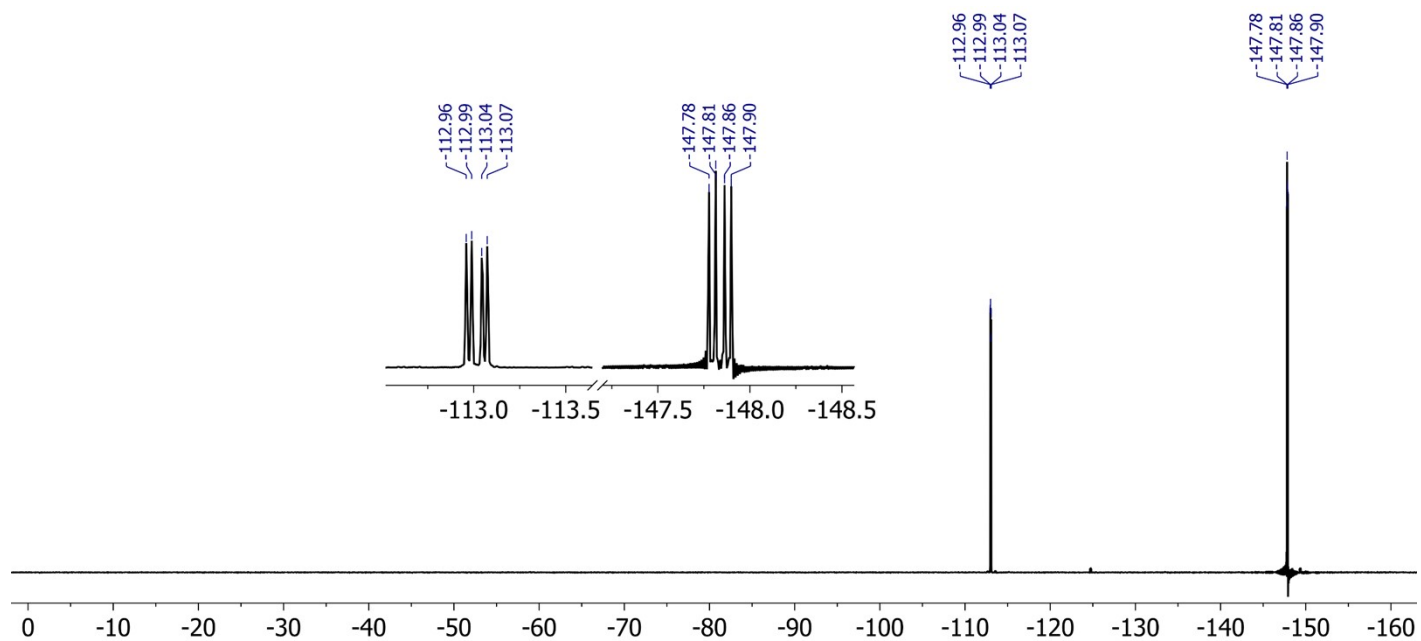

**Figure S2.**  $^{19}\text{F}$  NMR (282 MHz,  $\text{CDCl}_3$ ) spectrum of **2**.

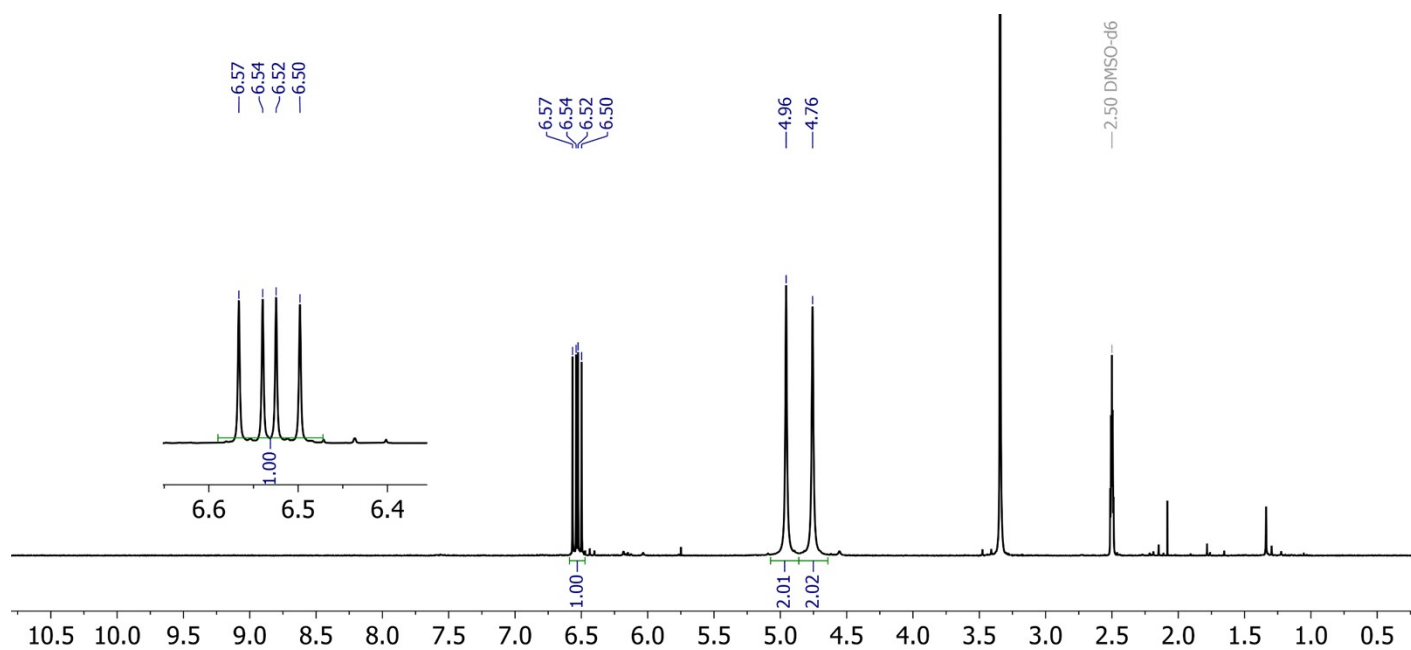

**Figure S3.**  $^1\text{H}$  NMR (300 MHz,  $\text{DMSO}-d_6$ ) spectrum of **3**.

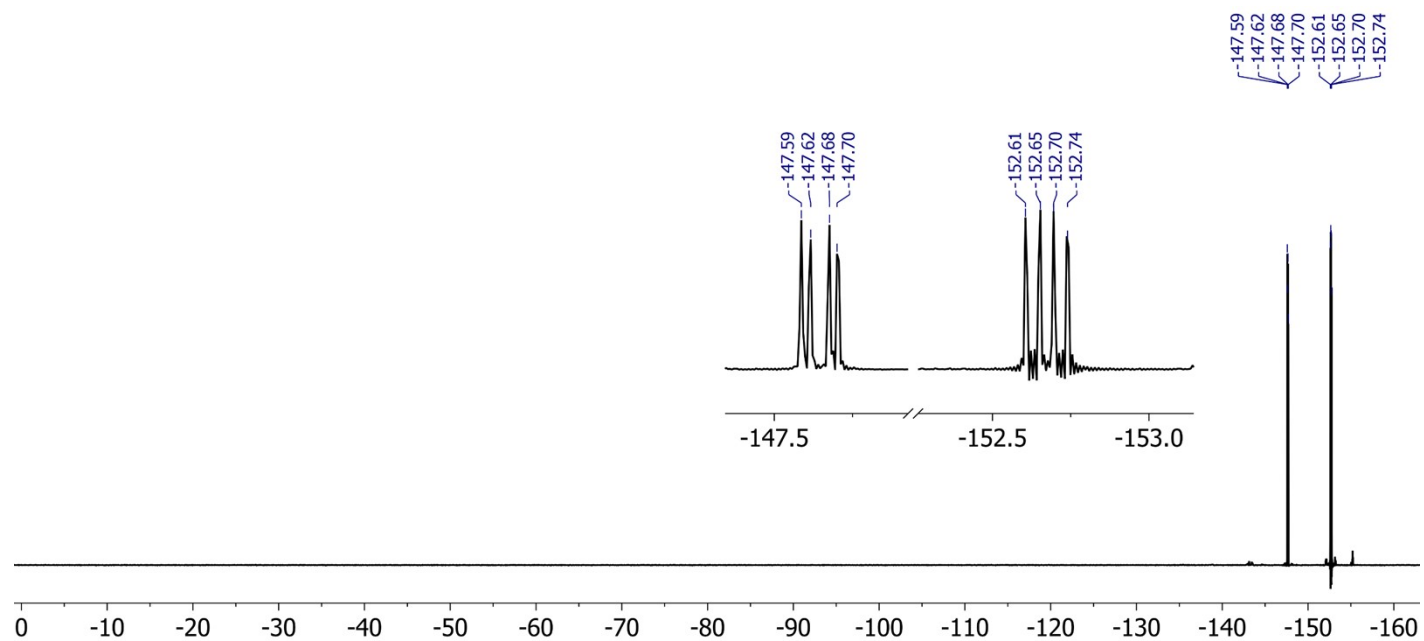

**Figure S4.** <sup>19</sup>F NMR (282 MHz, DMSO-*d*<sub>6</sub>) NMR spectrum of **3**.

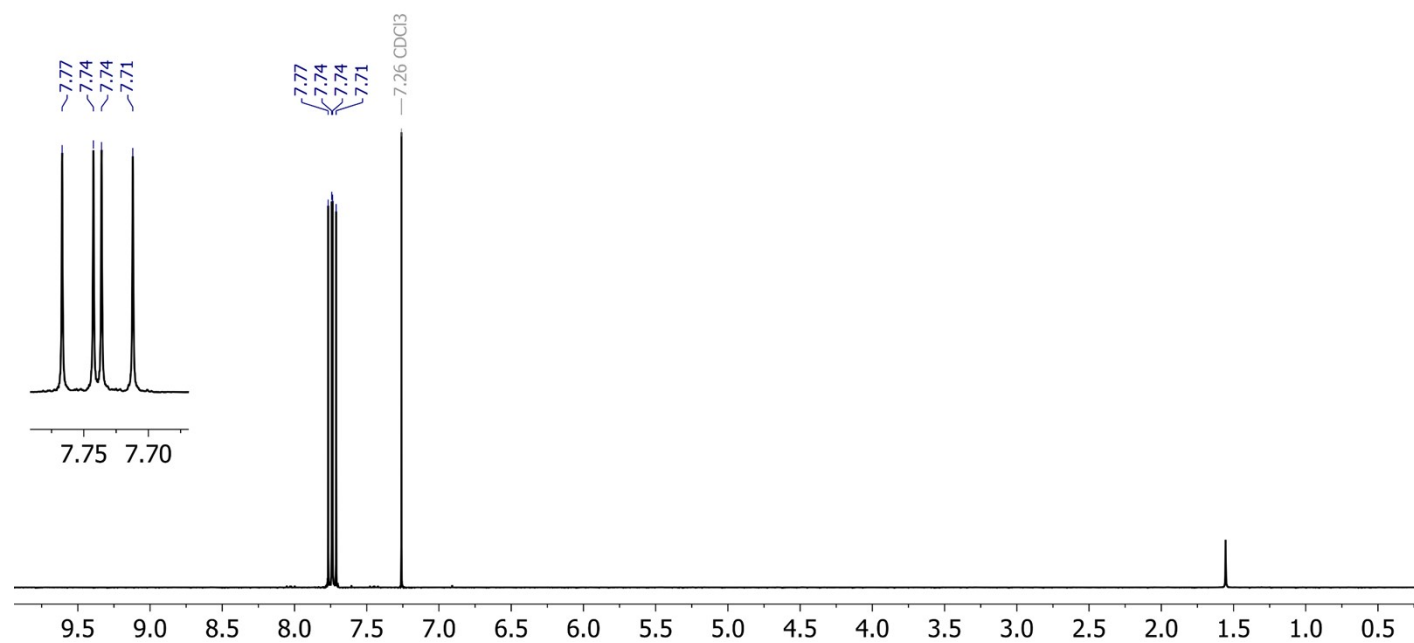

**Figure S5.** <sup>1</sup>H NMR (300 MHz, CDCl<sub>3</sub>) spectrum of **4**.

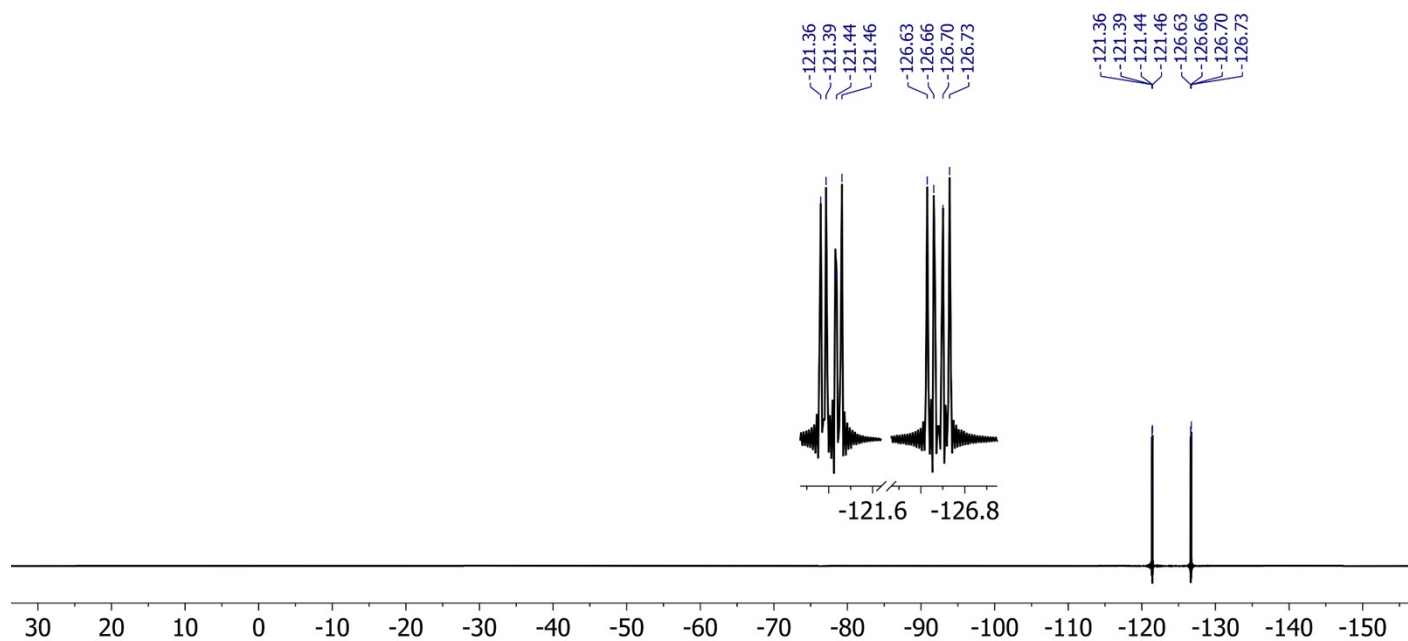

**Figure S6.**  $^{19}\text{F}$  NMR (282 MHz,  $\text{CDCl}_3$ ) spectrum of **4**.

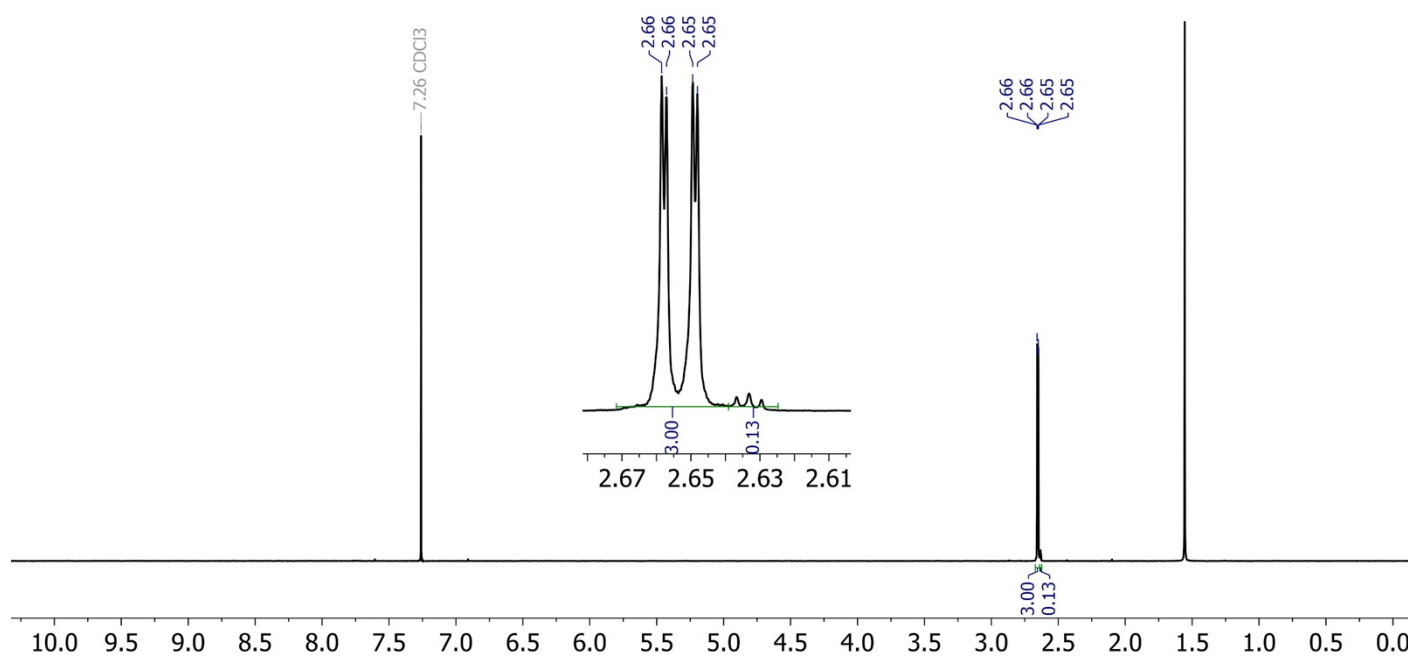

**Figure S7.**  $^1\text{H}$  NMR (300 MHz,  $\text{CDCl}_3$ ) spectrum of **5**. A trace of 5,6-difluoro-4,7-dimethylbenzo[*c*][1,2,5]thiadiazole remains present.

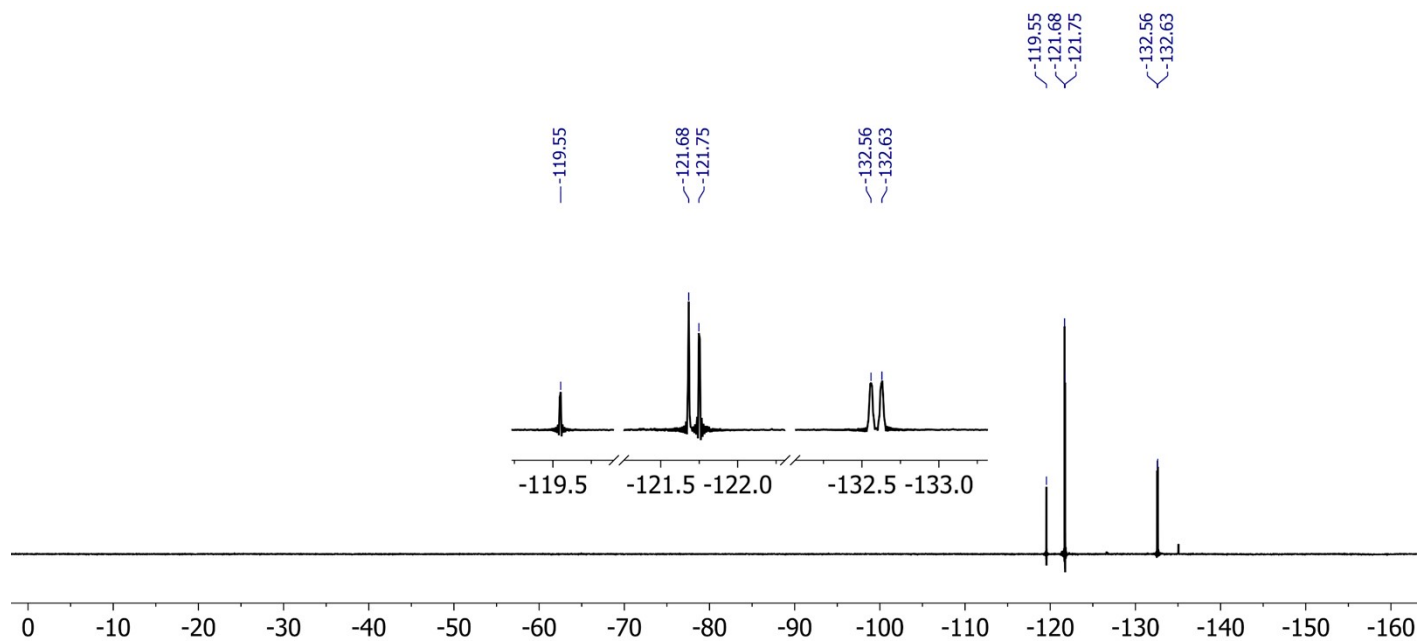

**Figure S8.**  $^{19}\text{F}$  NMR (282 MHz,  $\text{CDCl}_3$ ) spectrum of **5**. A trace of 5,6-difluoro-4,7-dimethylbenzo[*c*][1,2,5]thiadiazole remains present.

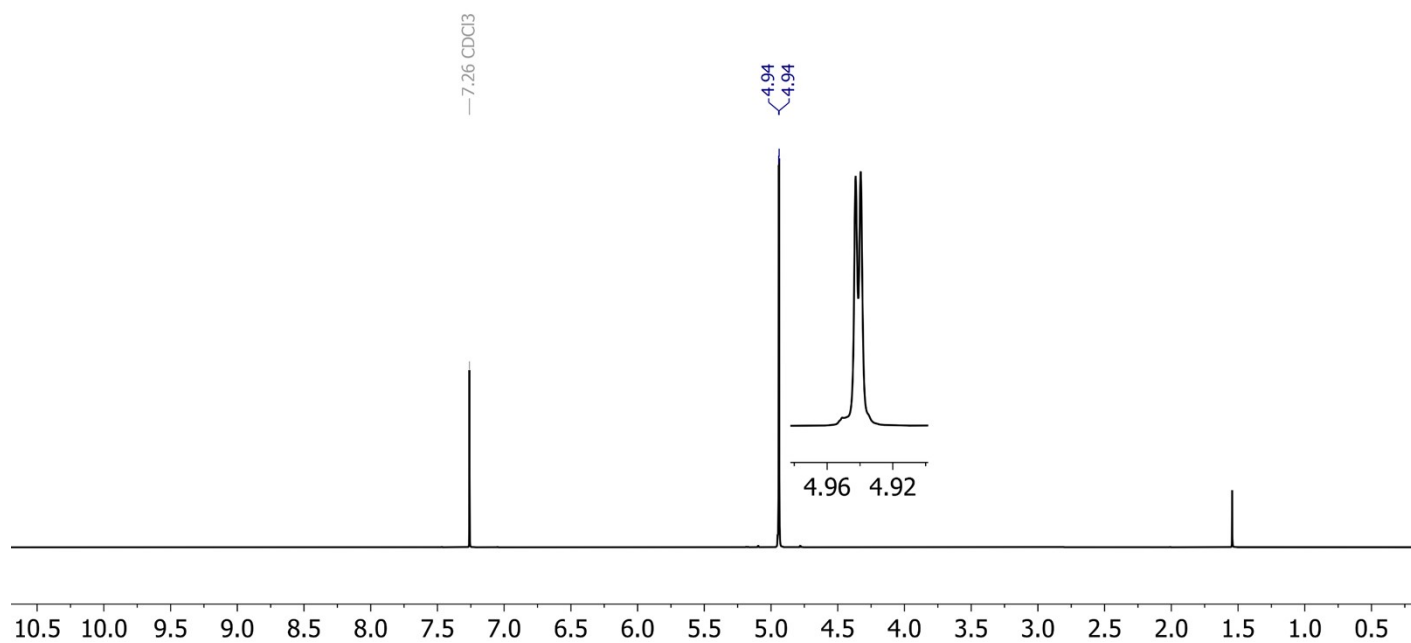

**Figure S9.**  $^1\text{H}$  NMR (500 MHz,  $\text{CDCl}_3$ ) spectrum of **6**. A trace of 4,7-bis(bromomethyl)-5,6-difluorobenzo[*c*][1,2,5]thiadiazole remains present.

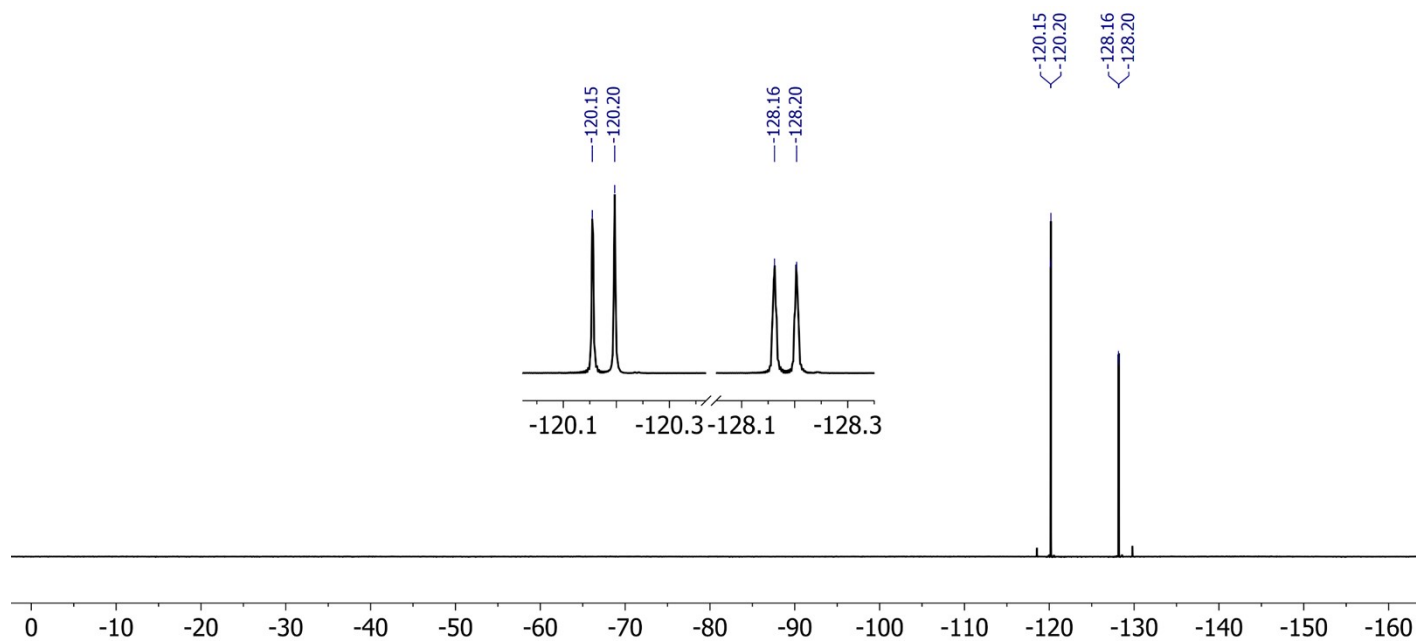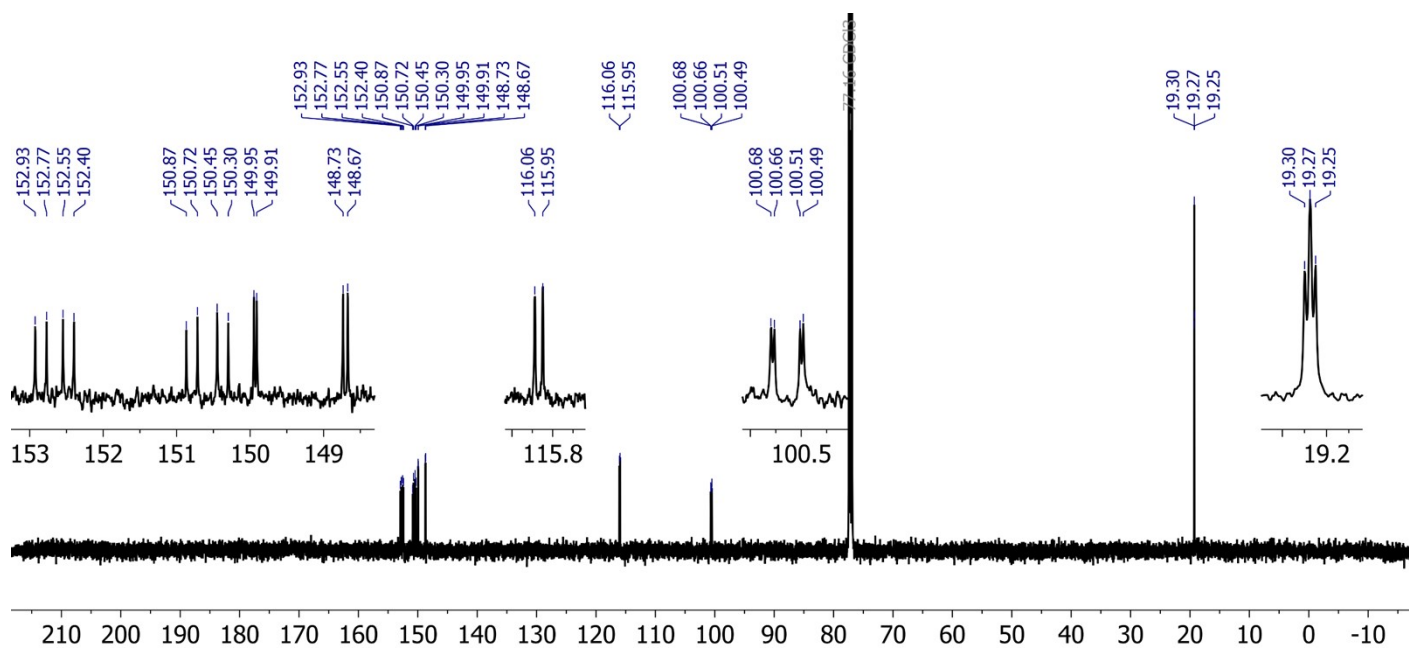

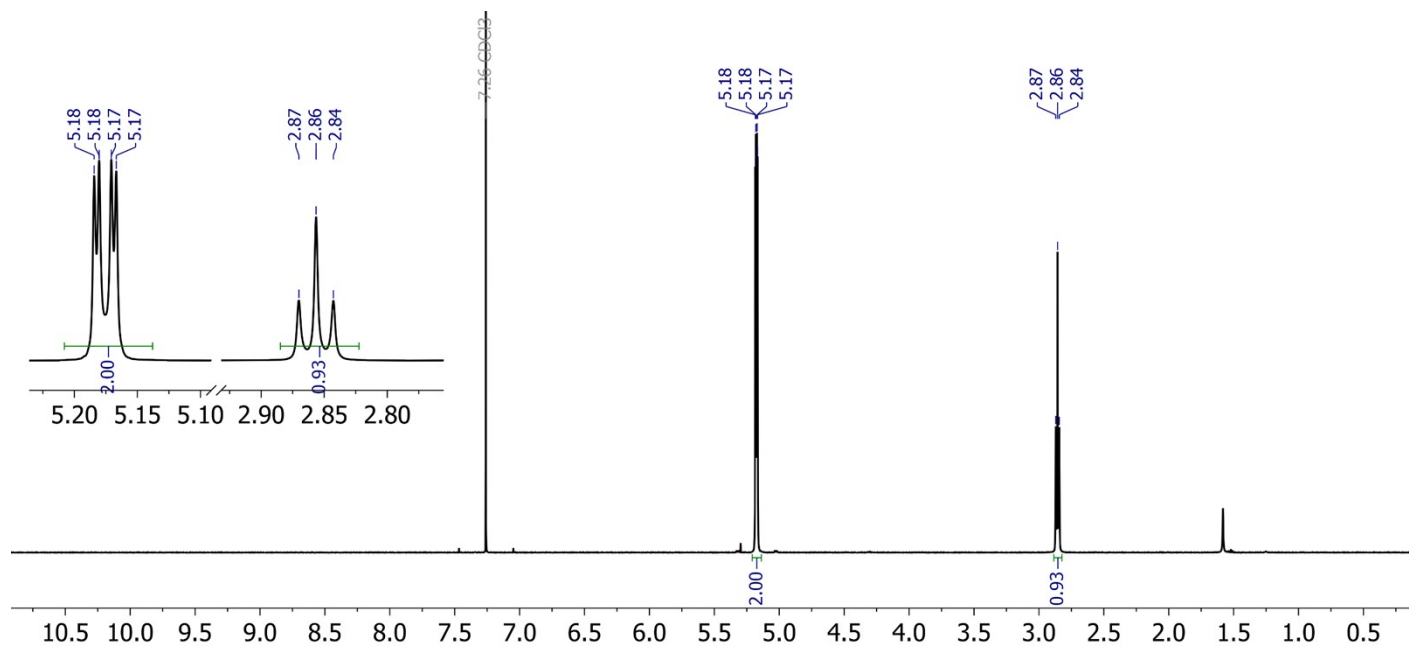

**Figure S12.** <sup>1</sup>H NMR (500 MHz, CDCl<sub>3</sub>) spectrum of 7.

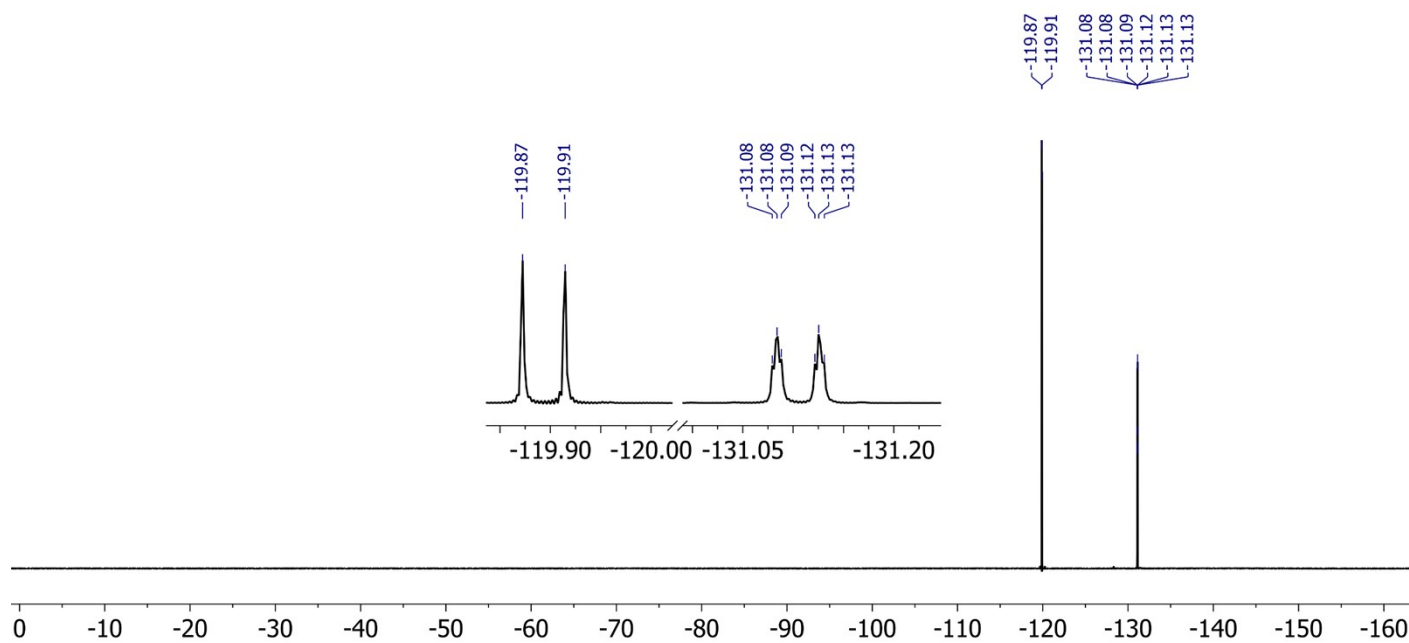

**Figure S13.** <sup>19</sup>F NMR (470 MHz, CDCl<sub>3</sub>) spectrum of 7.

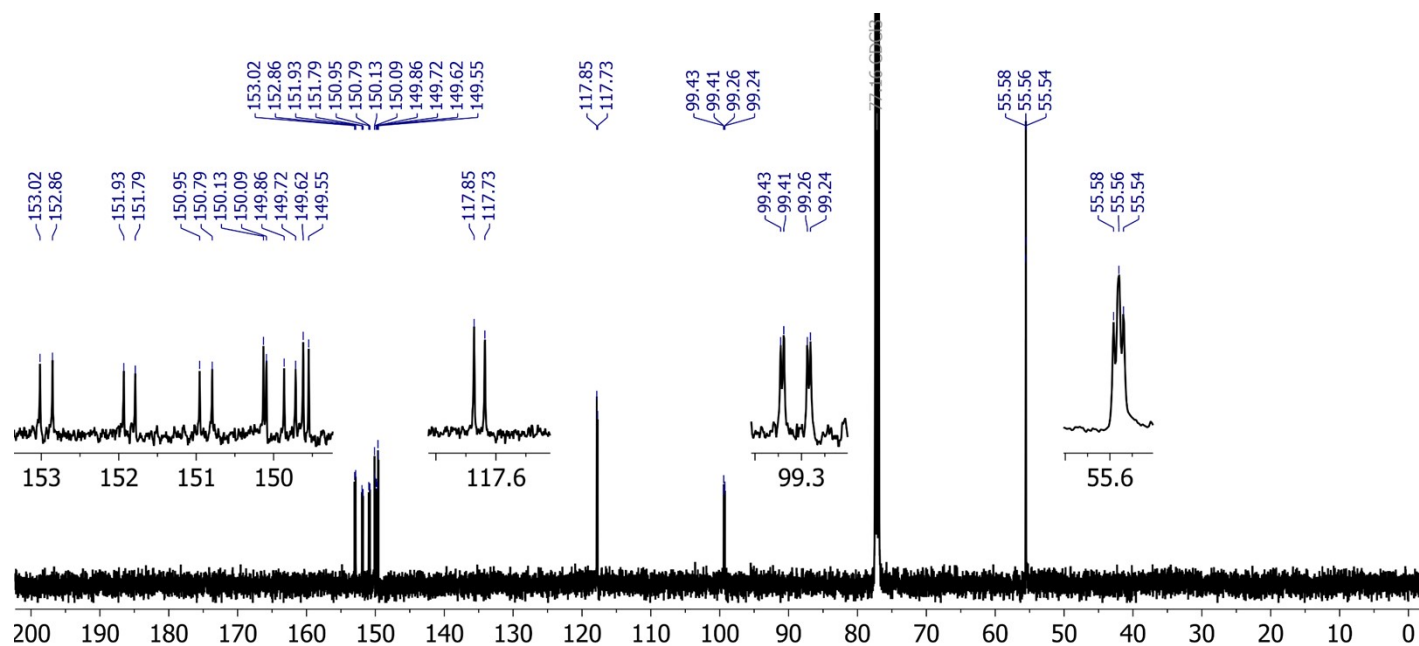

**Figure S14.** <sup>13</sup>C{<sup>1</sup>H} NMR (126 MHz, CDCl<sub>3</sub>) spectrum of **7**.

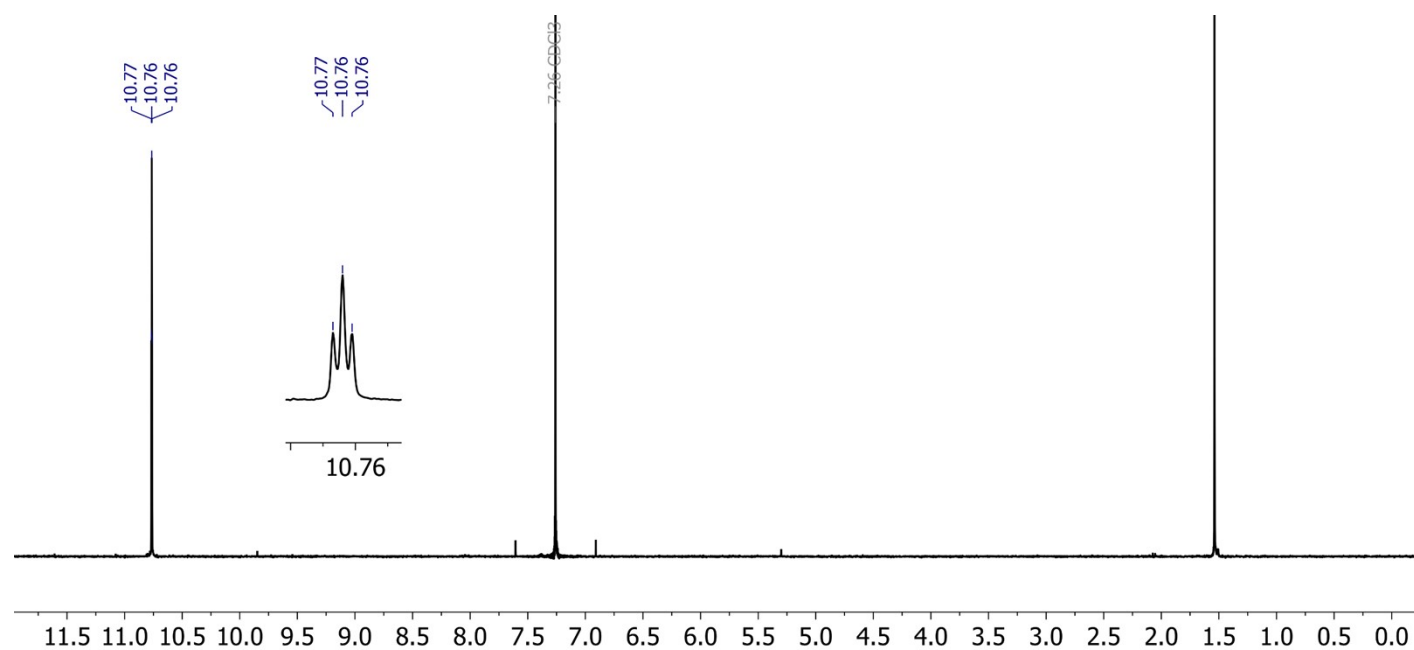

**Figure S15.** <sup>1</sup>H NMR (300 MHz, CDCl<sub>3</sub>) spectrum of **8**.

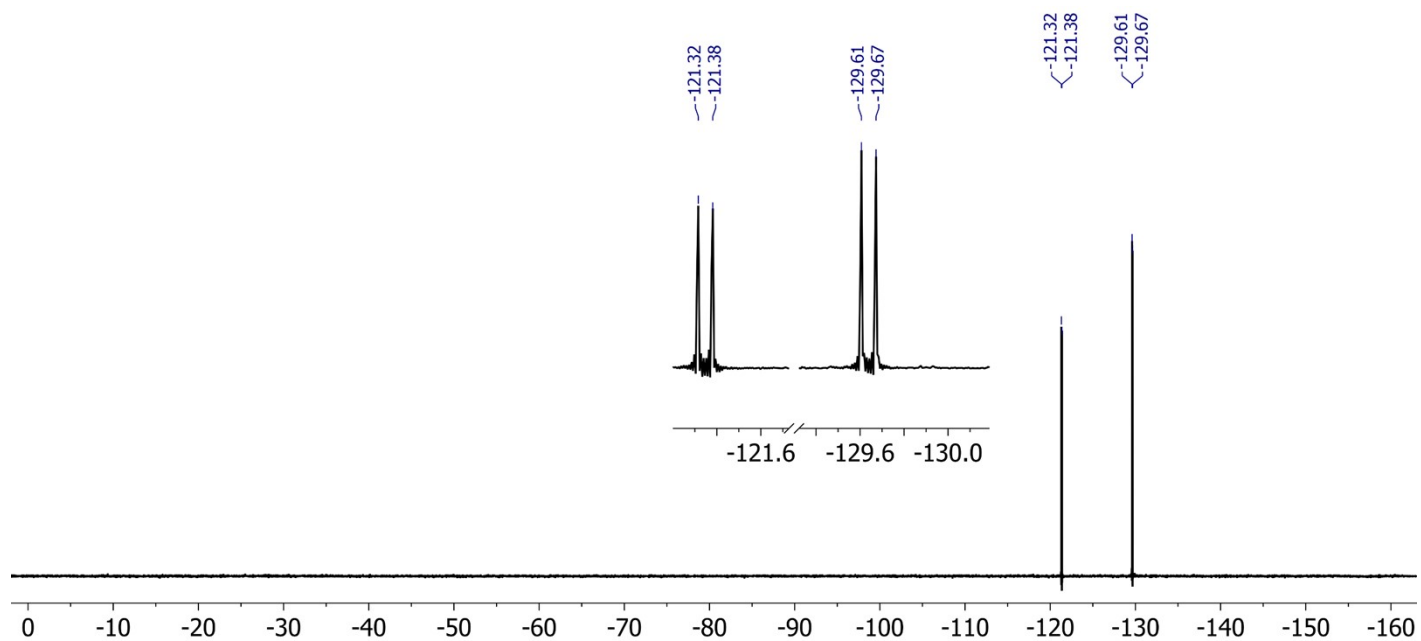

**Figure S16.**  $^{19}\text{F}$  NMR (282 MHz,  $\text{CDCl}_3$ ) spectrum of **8**.

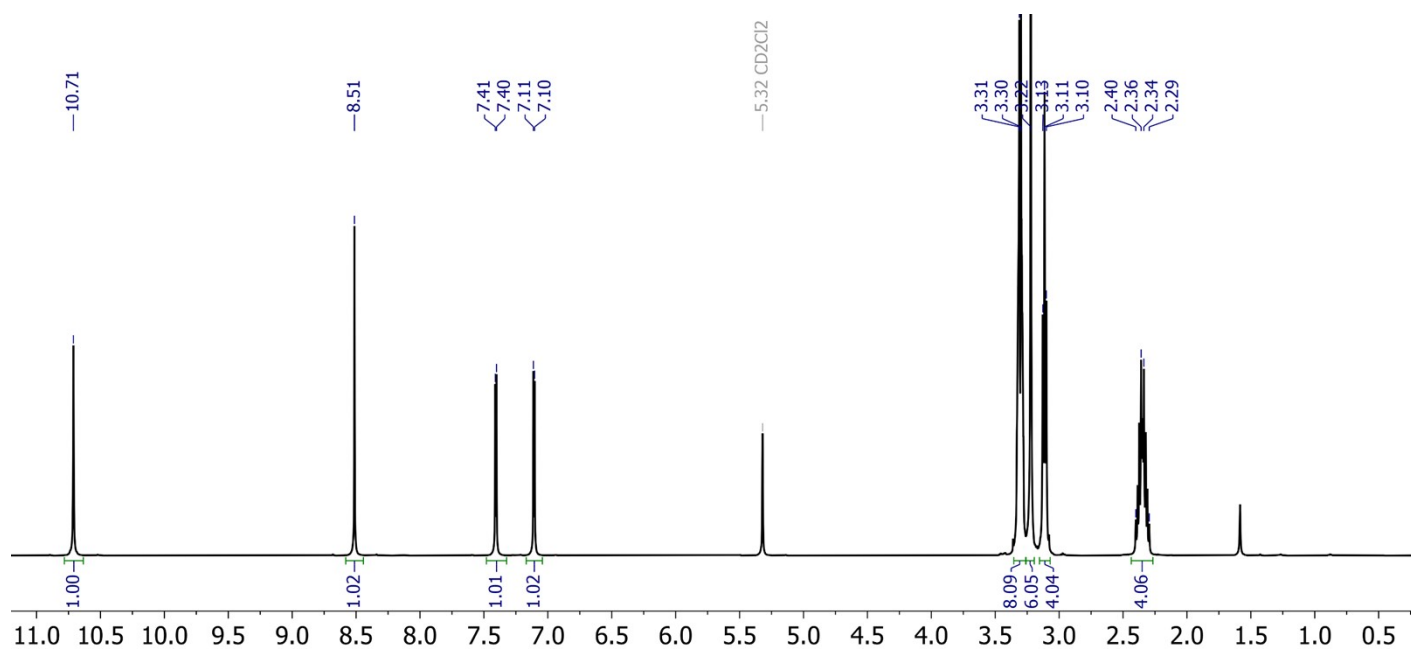

**Figure S17.**  $^1\text{H}$  NMR (500 MHz,  $\text{CD}_2\text{Cl}_2$ ) spectrum of **CPDT-DFBT-Ald**.

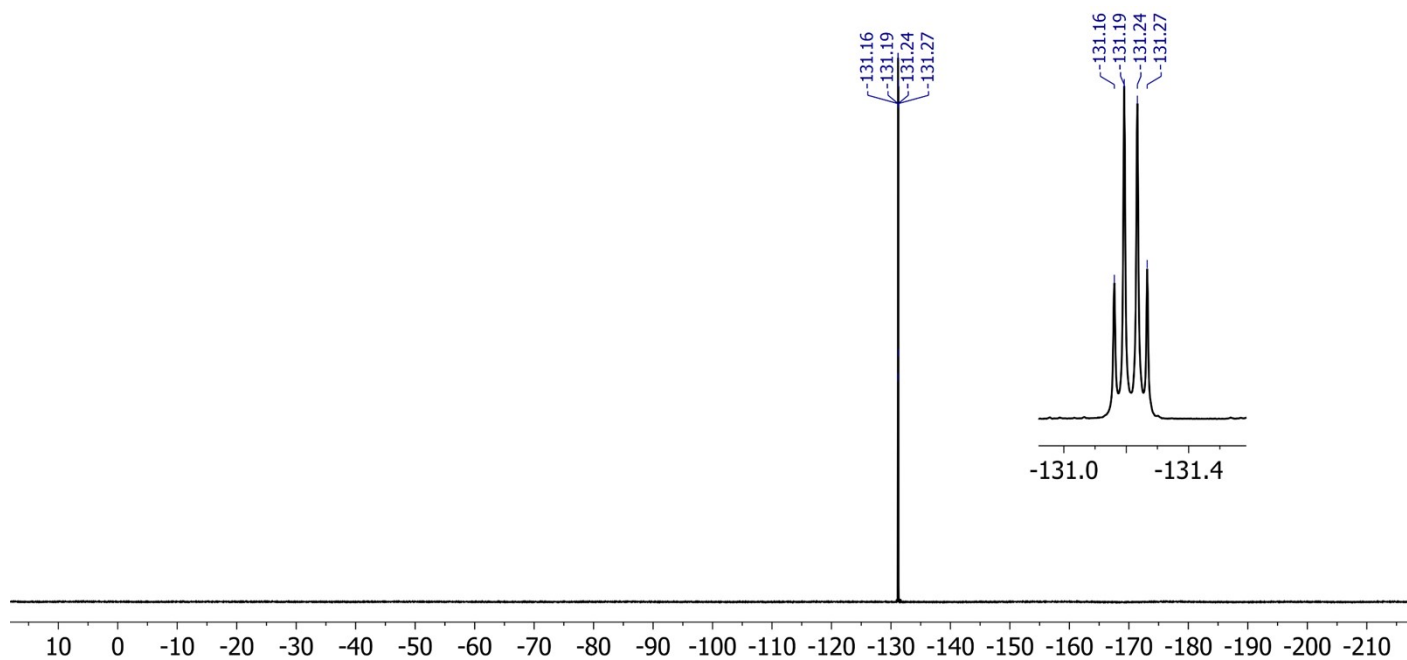

**Figure S18.**  $^{19}\text{F}$  NMR (470 MHz,  $\text{CD}_2\text{Cl}_2$ ) spectrum of CPDT-DFBT-Ald.

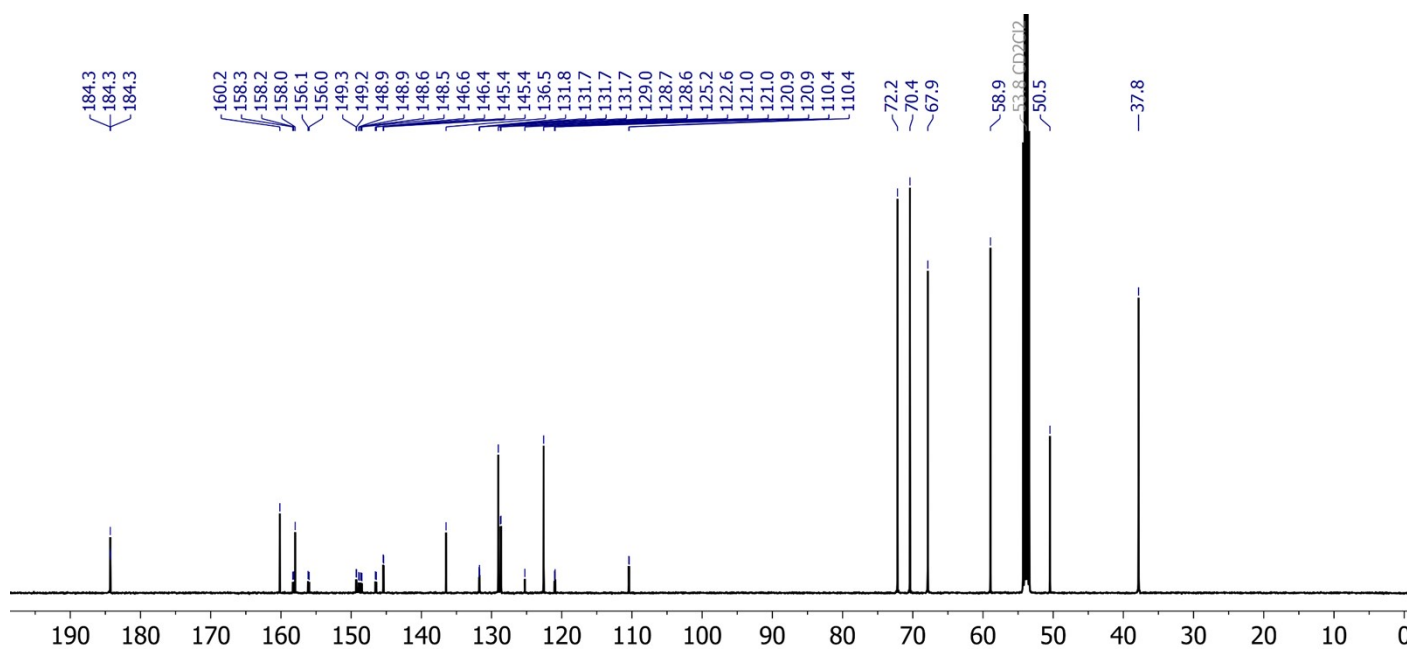

**Figure S19.**  $^{13}\text{C}\{^1\text{H}\}$  NMR (126 MHz,  $\text{CD}_2\text{Cl}_2$ ) spectrum of CPDT-DFBT-Ald.

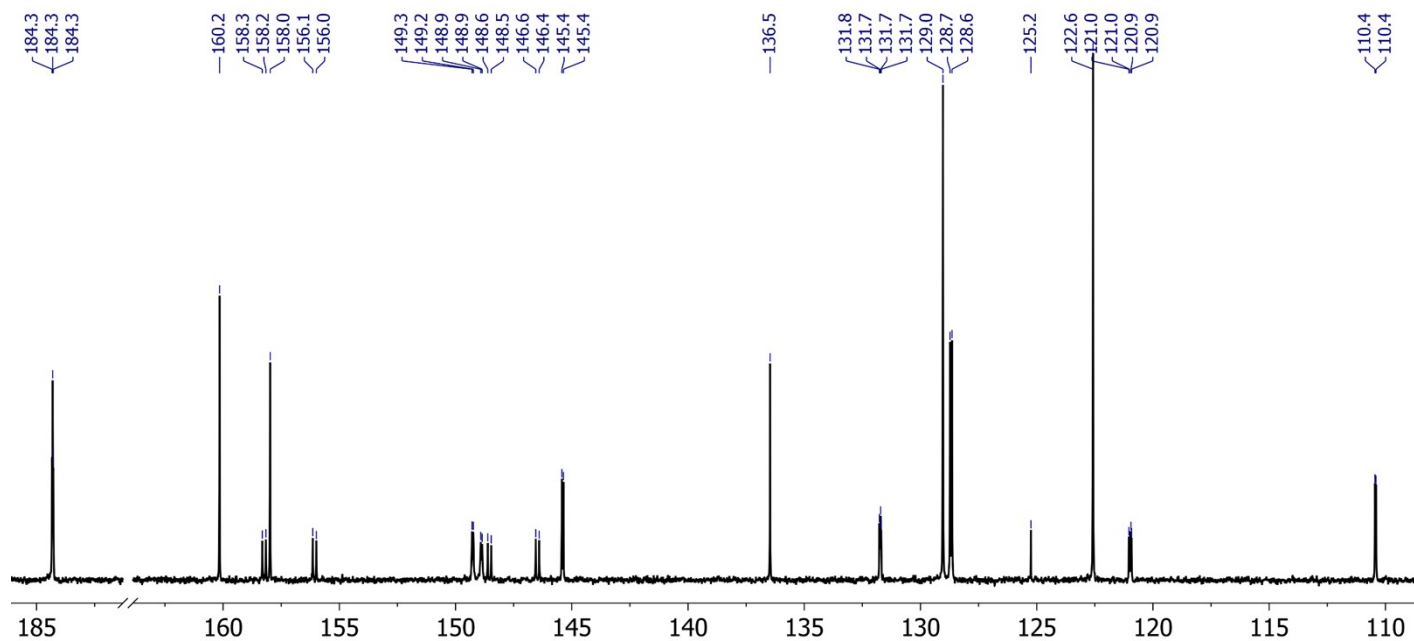

**Figure S20.** Expansion of the aromatic region of the  $^{13}\text{C}\{^1\text{H}\}$  NMR (126 MHz,  $\text{CD}_2\text{Cl}_2$ ) spectrum of **CPDT-DFBT-Ald**. The signal at 125.26 ppm is due to dissolved carbon dioxide.

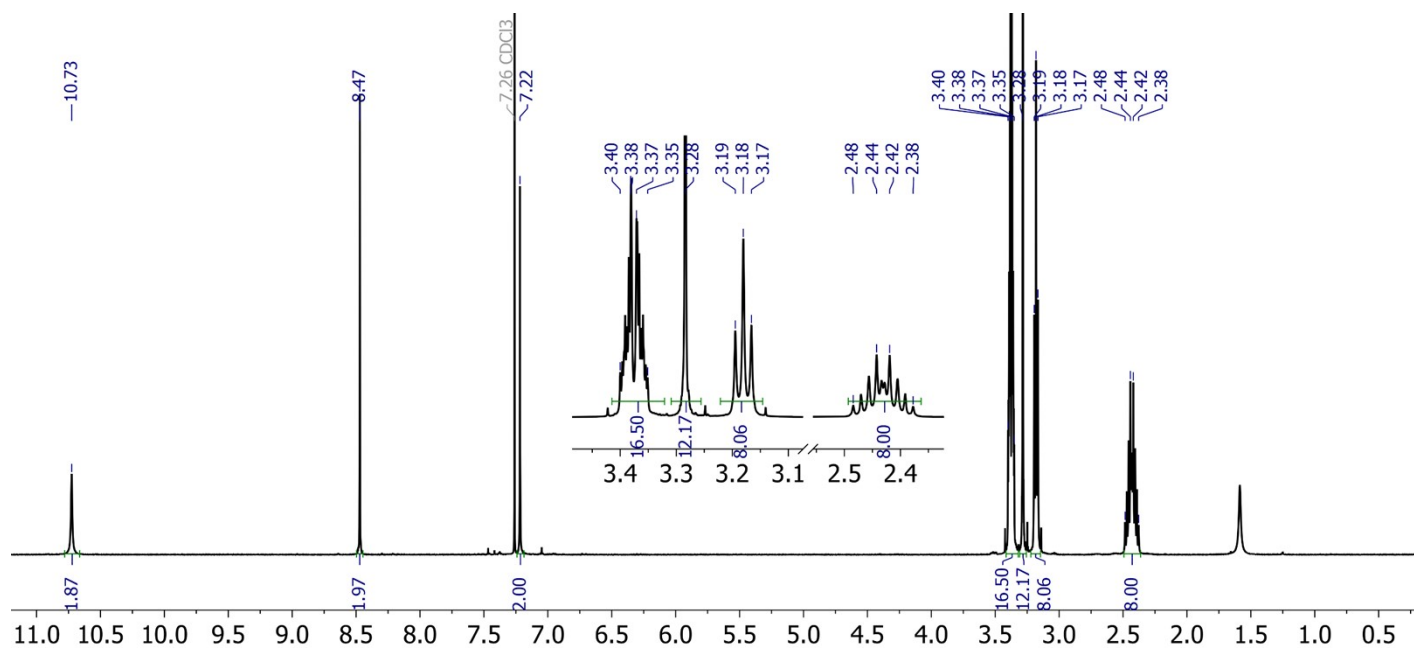

**Figure S21.**  $^1\text{H}$  NMR (500 MHz,  $\text{CDCl}_3$ ) spectrum of **D(CPDT-DFBT-Ald)**.

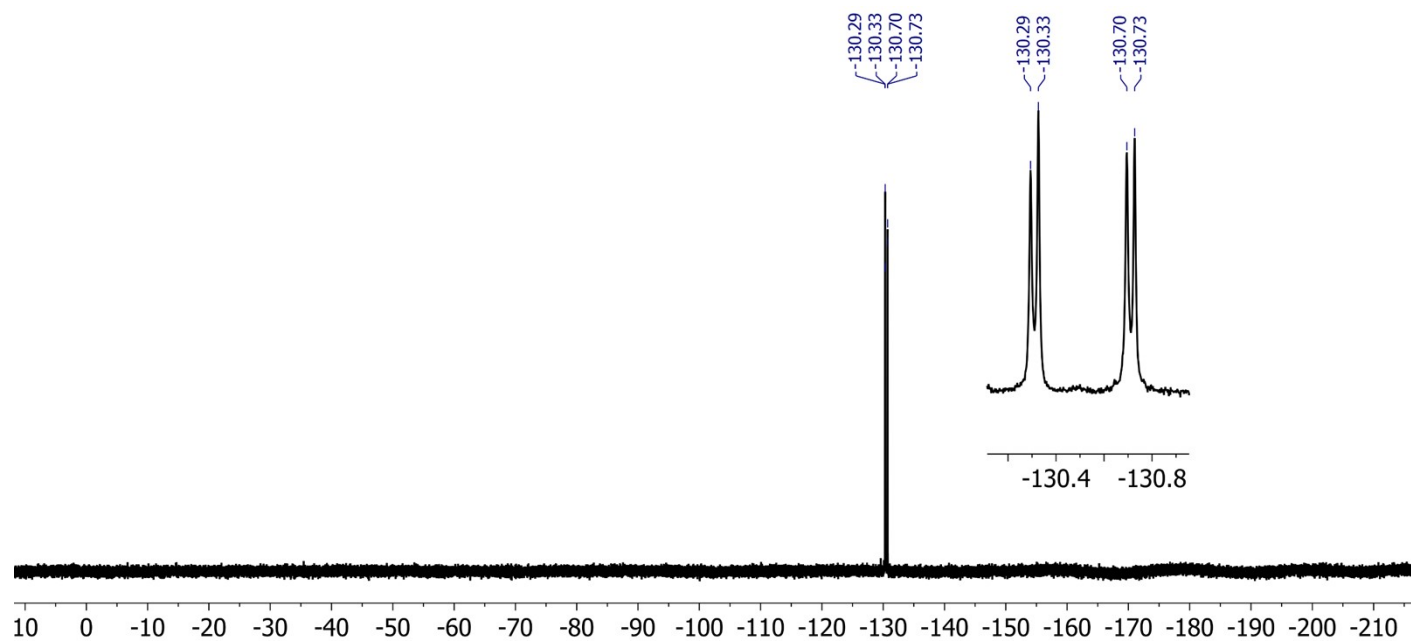

**Figure S22.**  $^{19}\text{F}$  NMR (470 MHz,  $\text{CDCl}_3$ ) spectrum of D(CPDT-DFBT-Ald).

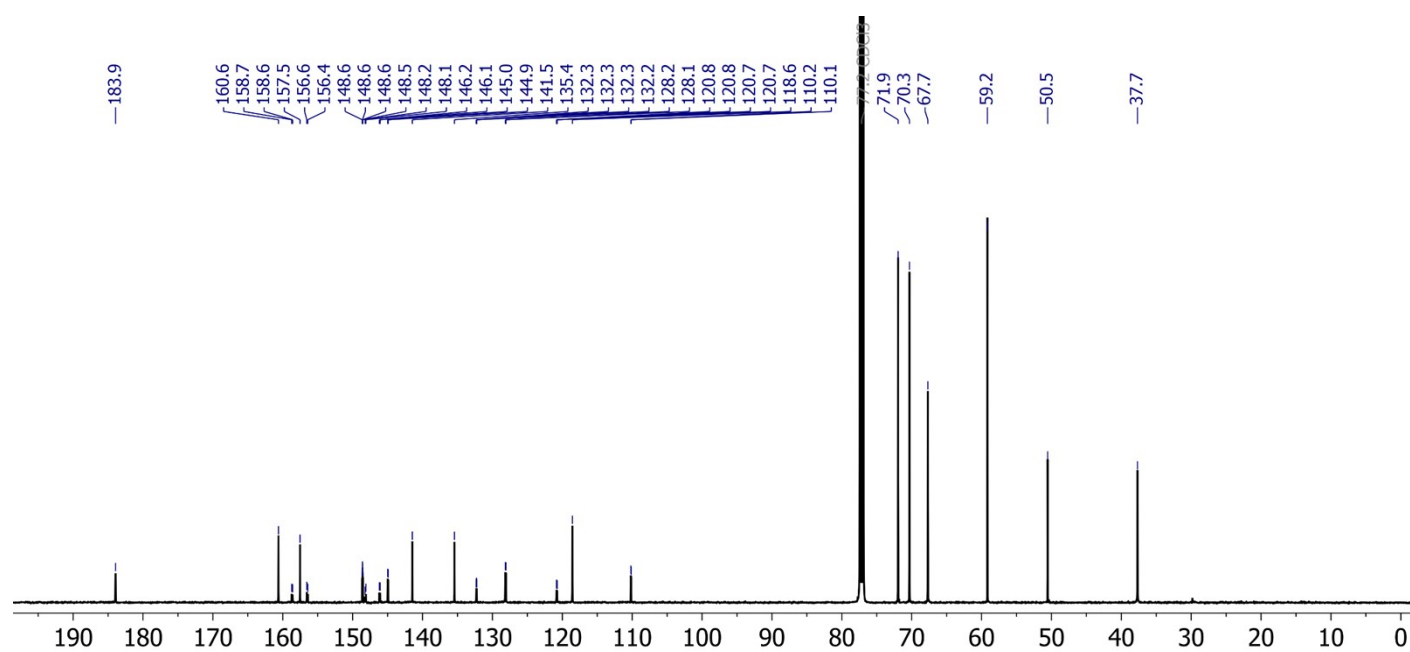

**Figure S23.**  $^{13}\text{C}\{^1\text{H}\}$  NMR (126 MHz,  $\text{CDCl}_3$ ) spectrum of D(CPDT-DFBT-Ald).

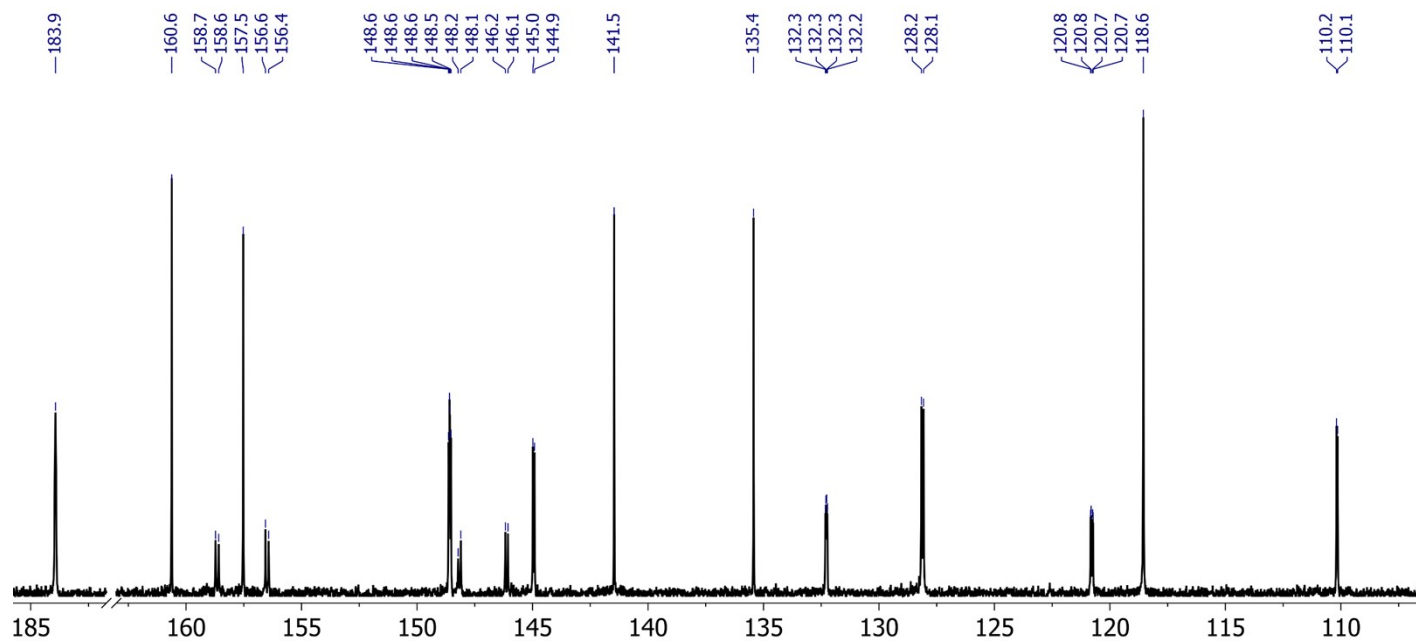

**Figure S24.** Expansion of the aromatic region of the  $^{13}\text{C}\{^1\text{H}\}$  NMR (126 MHz,  $\text{CDCl}_3$ ) spectrum of D(CPDT-DFBT-Ald).

### Differential scanning calorimetry

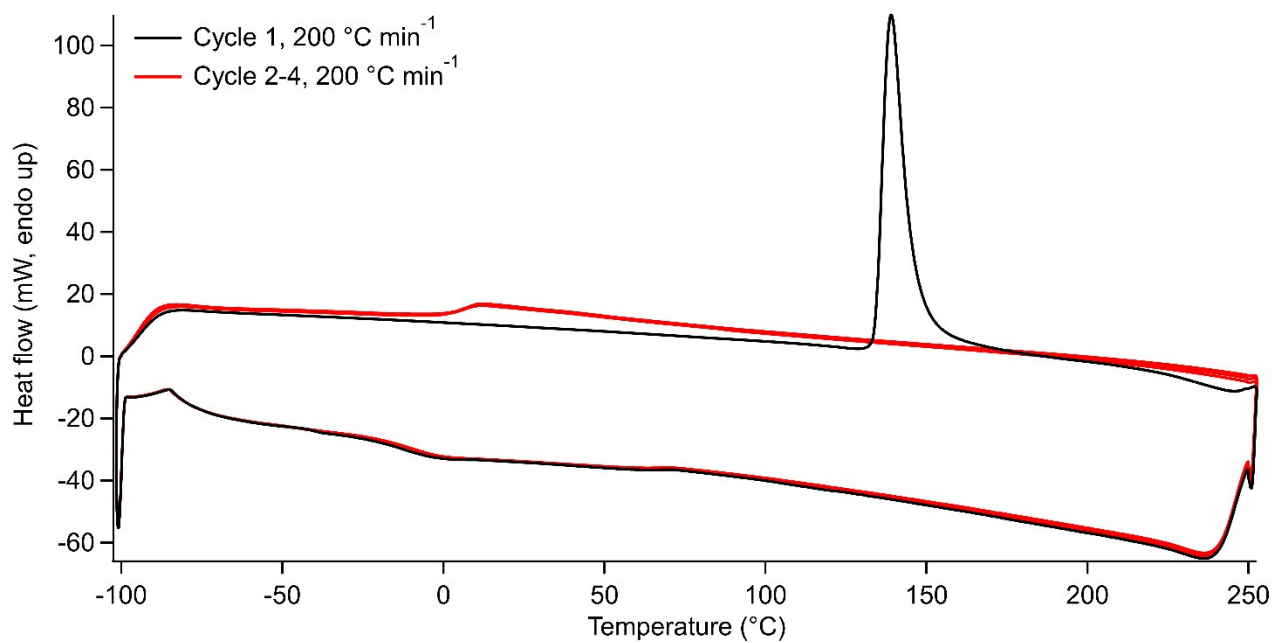

**Figure S25.** The DSC thermogram of **CPDT-BT-Ald**, measured at a scan rate  $200\text{ }^{\circ}\text{C min}^{-1}$ . The first heating/cooling cycle is plotted in black, subsequent cycles are plotted in red.

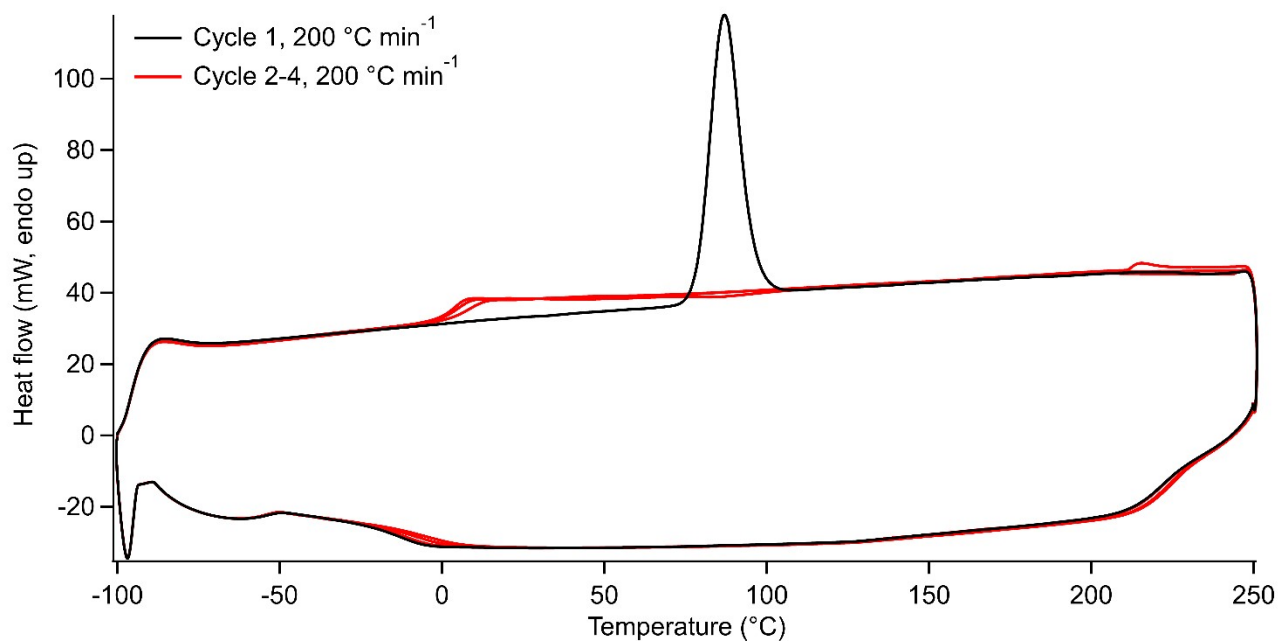

**Figure S26.** The DSC thermogram of **CPDT-DFBT-Ald**, measured at a scan rate  $200\text{ }^{\circ}\text{C min}^{-1}$ . The first heating/cooling cycle is plotted in black, subsequent cycles are plotted in red.

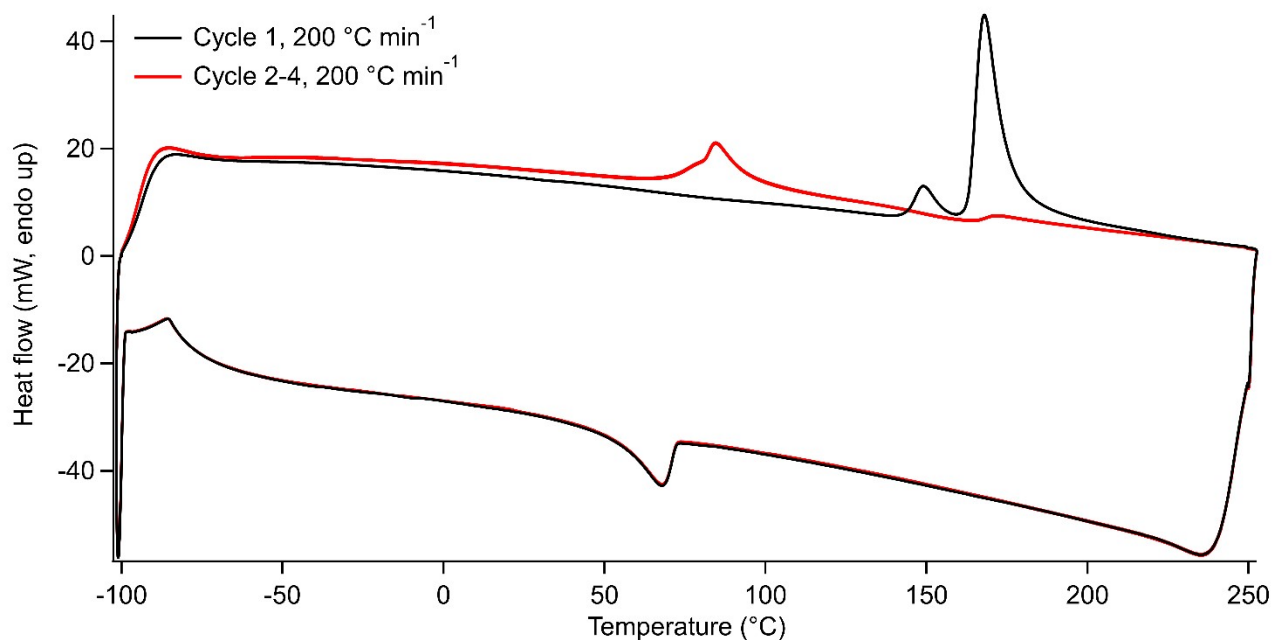

**Figure S27.** The DSC thermogram of **D(CPDT-BT-Ald)**, measured at a scan rate  $200\text{ }^{\circ}\text{C min}^{-1}$ . The first heating/cooling cycle is plotted in black, subsequent cycles are plotted in red.

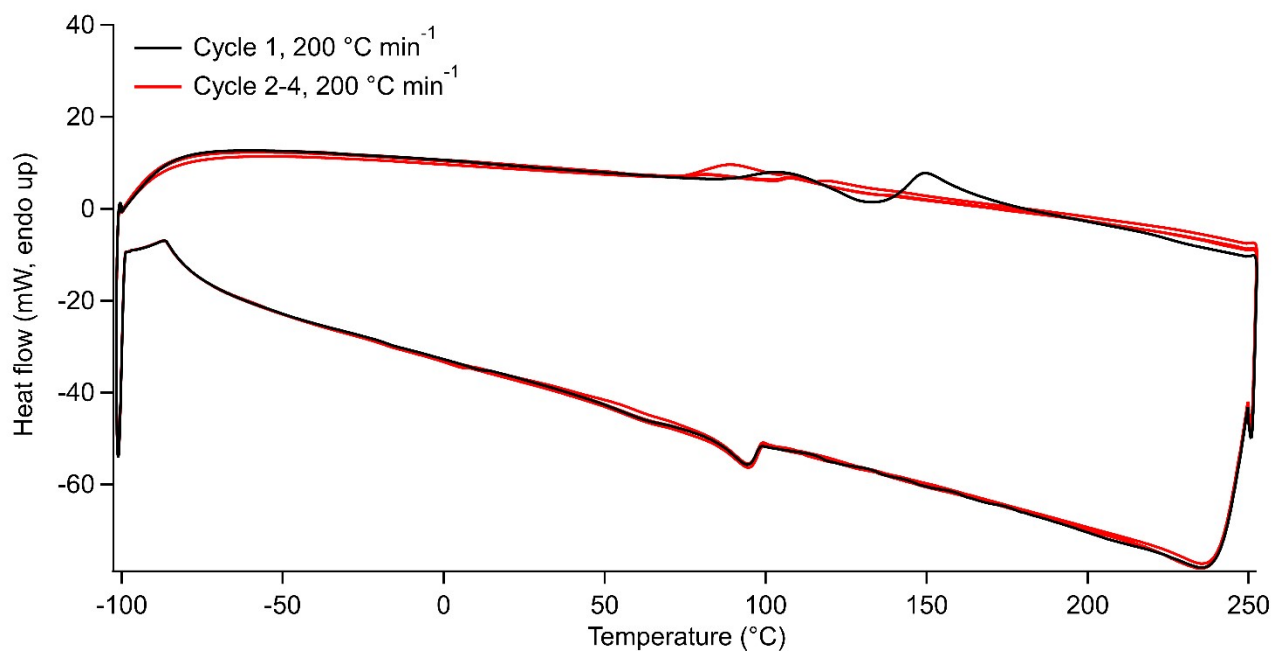

**Figure S28.** The DSC thermogram of **D(CPDT-DFBT-Ald)**, measured at a scan rate  $200\text{ }^{\circ}\text{C min}^{-1}$ . The first heating/cooling cycle is plotted in black, subsequent cycles are plotted in red.

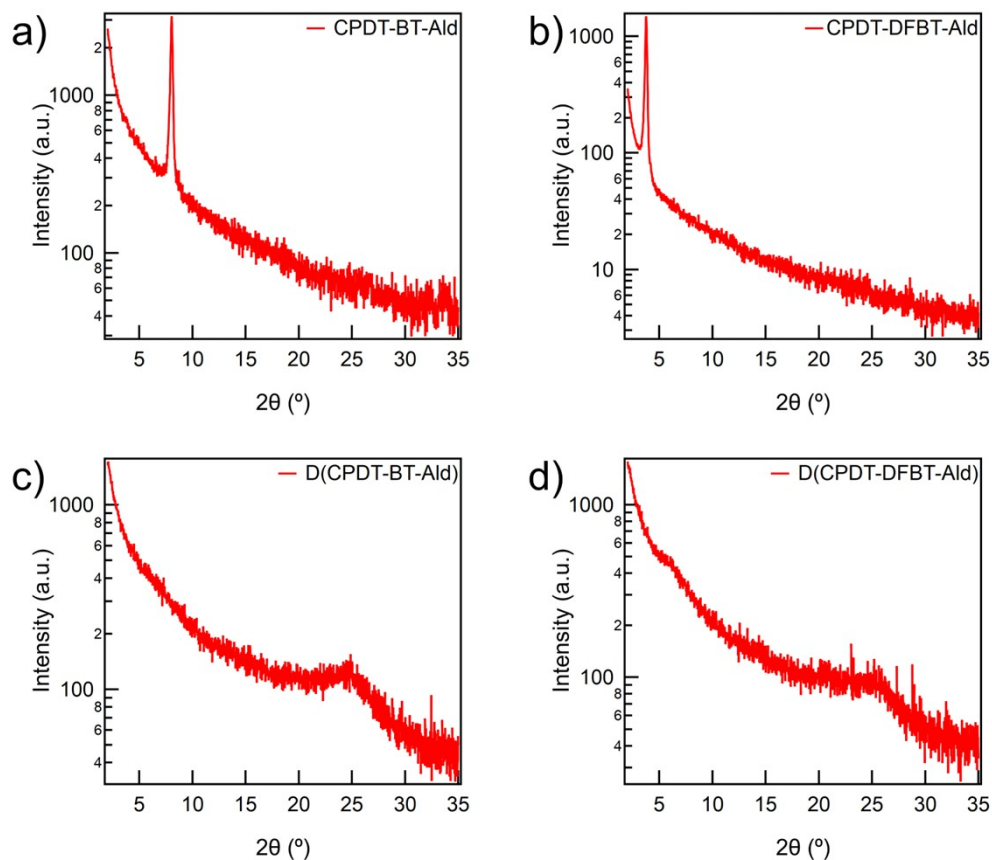

**Figure S29.** Grazing-incidence X-ray diffraction (GIXRD) graphs of aged films of a) **CPDT-BT-Ald**, b) **CPDT-DFBT-Ald**, c) **D(CPDT-BT-Ald)** and d) **D(CPDT-DFBT-Ald)**. The data was collected out-of-plane at an incidence angle of  $0.3^\circ$ .

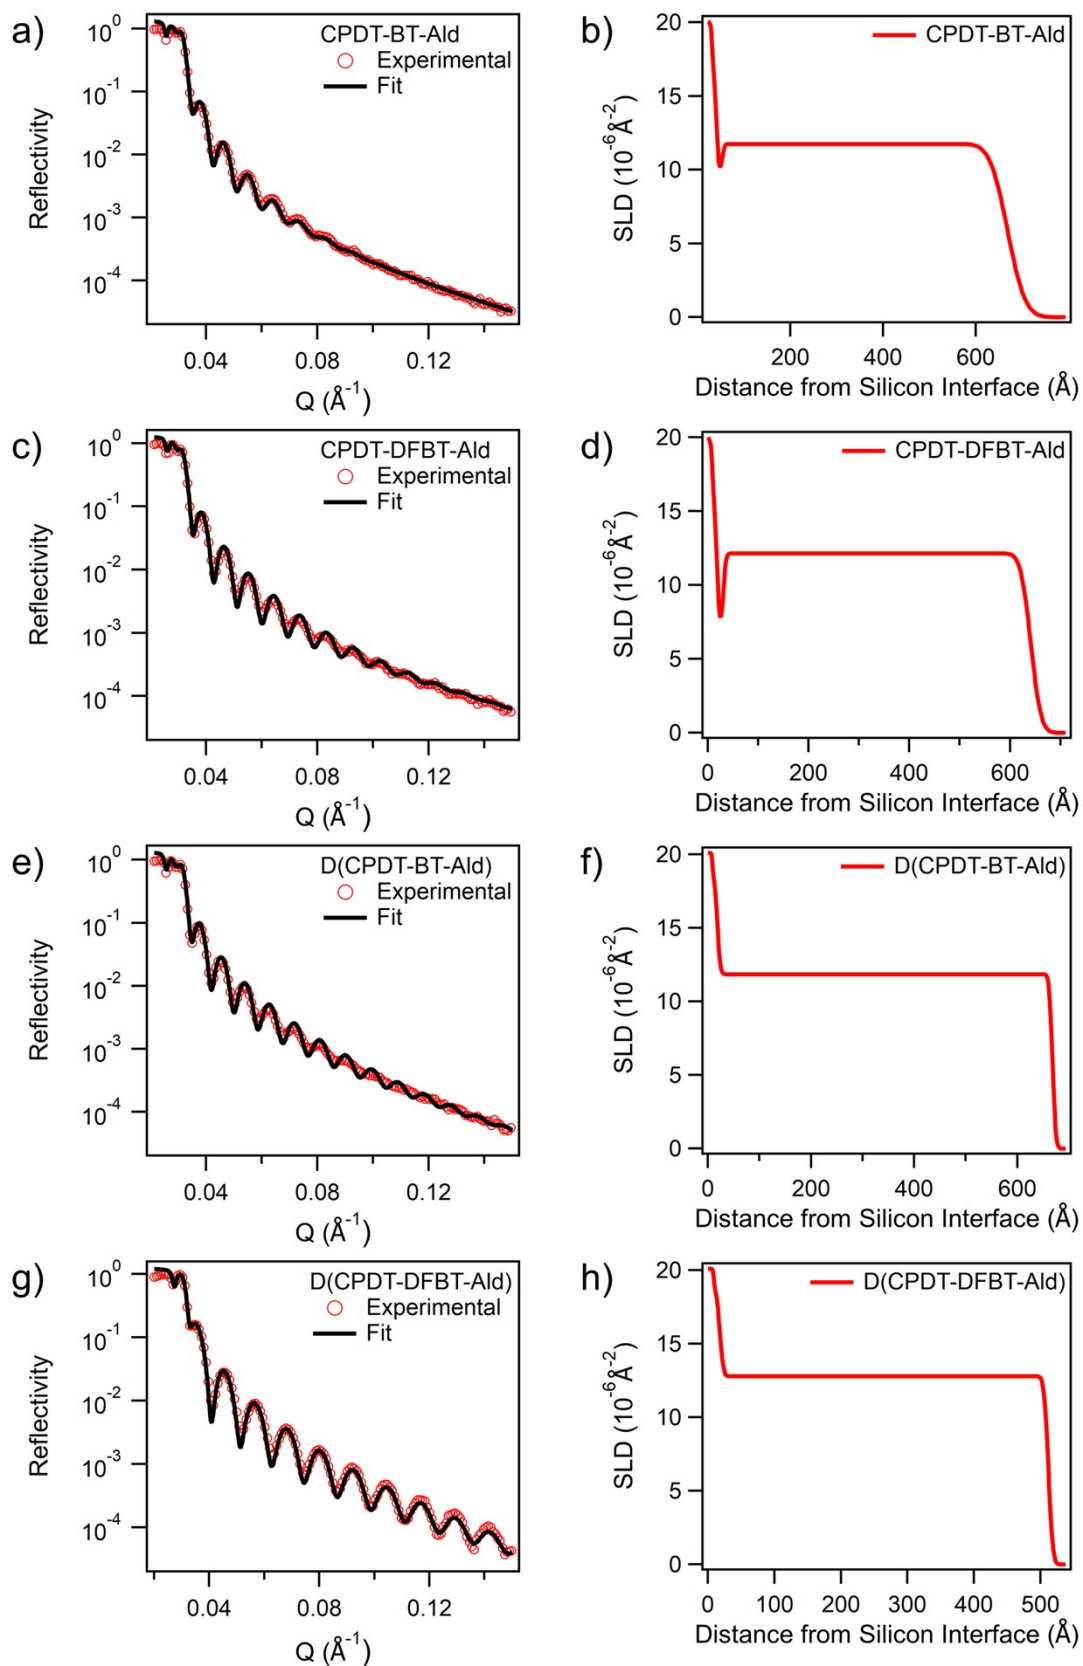

**Figure S30.** X-ray reflectometry profiles and fits (left) and corresponding scattering length density profiles (right) of CPDT-BT-Ald (a, b), CPDT-DFBT-Ald (c, d), D(CPDT-BT-Ald) (e, f) and D(CPDT-DFBT-Ald) (g, h). Measurements were performed on amorphous, freshly cast films.

**Table S1.** Summary of the X-ray reflectometry results, obtained from measurements on freshly cast films. The thickness and scattering length density are determined by a model fit to the experimental data. The density is calculated from the fitted scattering length density.

| Compound         | Thickness (nm) | Scattering length density ( $10^{-6} \text{ \AA}^{-2}$ ) | Density ( $\text{g cm}^{-3}$ ) |
|------------------|----------------|----------------------------------------------------------|--------------------------------|
| CPDT-BT-Ald      | 61.8           | 11.8                                                     | 1.31                           |
| CPDT-DFBT-Ald    | 61.2           | 12.1                                                     | 1.36                           |
| D(CPDT-BT-Ald)   | 65.0           | 11.85                                                    | 1.32                           |
| D(CPDT-DFBT-Ald) | 49.4           | 12.79                                                    | 1.44                           |

## Electrochemistry

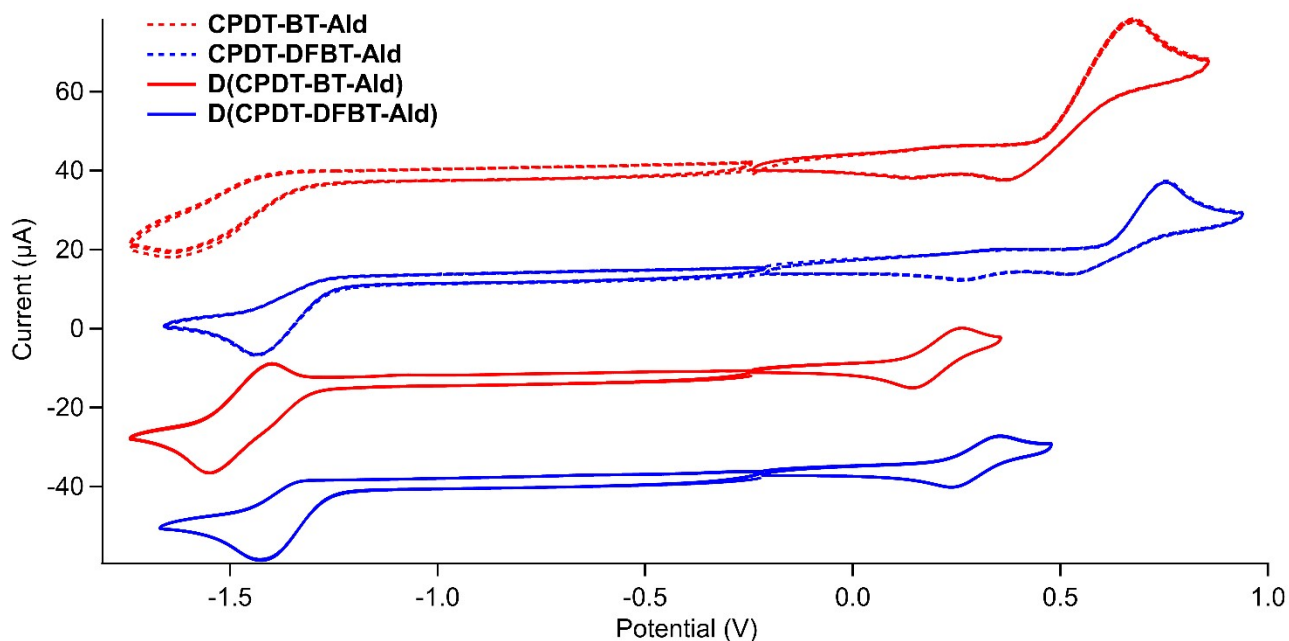

**Figure S31.** Stacked cyclic voltammograms (dichloromethane, 0.1 M tetrabutylammonium perchlorate) of the compounds, offset in the y-axis for clarity. Oxidation and reduction cycles were measured separately. Four full cycles of each are shown. The data was collected at a scan speed of  $50 \text{ mV s}^{-1}$  and referenced against the

ferrocene/ferrocenium couple. The  $E_{1/2}$  of the reductions were confirmed using differential pulse voltammetry when a clear anodic peak for the reduction was not observed.

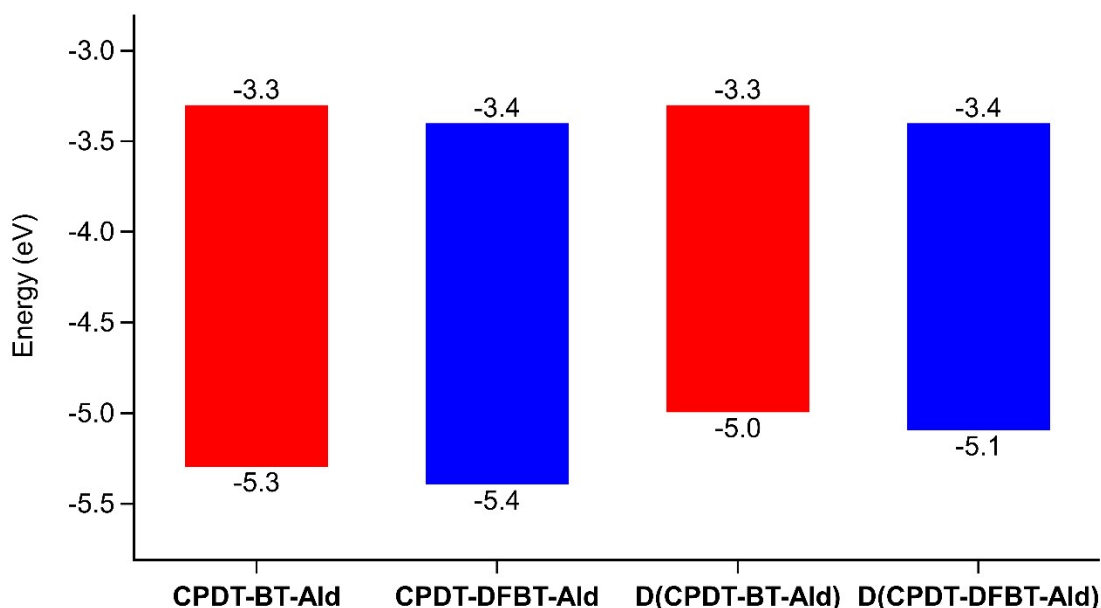

**Figure S32.** Estimated ionisation potentials and electron affinities calculated from the cyclic voltammetry  $E_{1/2}$ s (dichloromethane, 0.1 M tetrabutylammonium perchlorate, referenced against the ferrocene/ferrocenium couple), rounded to the nearest 0.1 eV. Ferrocene was taken as having an ionisation potential of 4.8 eV.

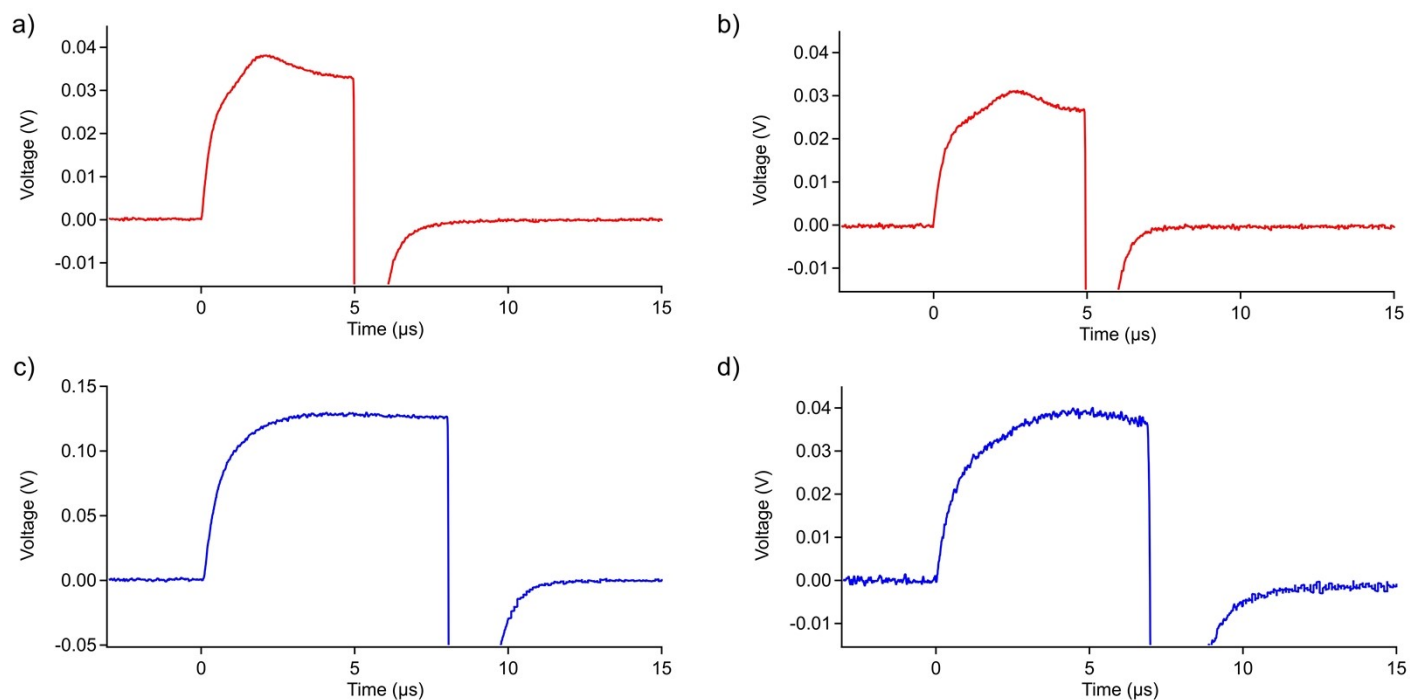

**Figure S33.** Electron and hole carrier transients for D(CPDT-BT-Ald) (a and b, respectively) and D(CPDT-DFBT-Ald) (c and d, respectively) measured using MIS-CELIV.

## Device fabrication and testing

15 mm  $\times$  15 mm 15 Ohm square<sup>-1</sup> ITO-coated glass substrates (Xinyan, Hong Kong) were cleaned in an Alconox solution at 70 °C before being sonicated in sequence with Alconox, de-ionised water, acetone and *iso*-propanol for 10 minutes each, followed by drying with pressurised nitrogen. The substrates were then treated in a UV-Ozone system for 20 min. The hole transport layer was prepared by filtering poly(3,4-ethylenedioxythiophene):polystyrene sulfonate (PEDOT:PSS AI 4083) through a 0.45  $\mu$ m filter before spin-coating the solution in air at 5000 rpm and annealing at 150 °C for 20 min in air to produce a 30 nm film. Solutions of **D(CPDT-BT-Ald)** and **D(CPDT-DFBT-Ald)** at a concentration of 10 mg mL<sup>-1</sup> were prepared in chloroform. All active layers were spin-coated in a nitrogen-filled MBraun glovebox (oxygen and water concentrations of < 1 ppm) onto the ITO/PEDOT:PSS substrates at 2000 rpm to produce films with thicknesses of 40–50 nm. The film thicknesses were measured with a Bruker DektakXT profilometer. Finally, 10 nm of bathocuproine (BCP), 25 nm of calcium (Ca), and 100 nm of silver (Ag) were sequentially thermally deposited through a shadow mask under a 10<sup>-6</sup> mbar vacuum. The final effective area for each device was 0.08 cm<sup>2</sup> with four complete devices prepared on each substrate.

The devices were tested in a nitrogen filled MBraun glove box with oxygen and water concentrations of < 1 ppm. Current-voltage (*J-V*) characteristics were acquired using a Keithley 2400 Source Measurement Unit with a 4-wire configuration to eliminate the effect of the cable resistances and the internal impedance of the SMU. A Newport Sol3A AM 1.5G solar simulator was used to simulate Air Mass 1.5 Global (AM 1.5 G) illumination. The illumination intensity of 1 sun used for the organic solar cell measurements was set using a Newport-calibrated meter in conjunction with an unfiltered silicon reference cell. The *J-V* curves were measured on at least four devices for statistics. A 0.08 cm<sup>2</sup> shadow mask was applied to each device during testing.

The external quantum efficiency (EQE) spectra were recorded with a PV Measurement QEX7 setup, which was calibrated using an NREL-certified photodiode and operated without white-light bias and chopped and locked in the small perturbation limit. EQE measurements were performed from 400 nm to 1000 nm.

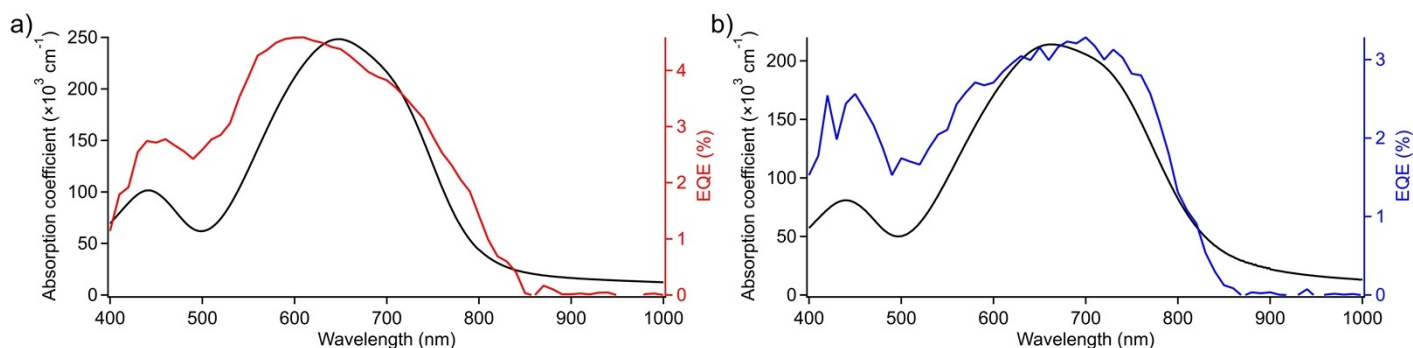

**Figure S34.** Thin-film absorption spectra and external quantum efficiency (EQE) of the homojunction devices with a structure of ITO/PEDOT:PSS/homojunction/BCP/Ca/Ag composed of **D(CPDT-BT-Ald)** (a) and

**D(CPDT-DFBT-Ald) (b).**

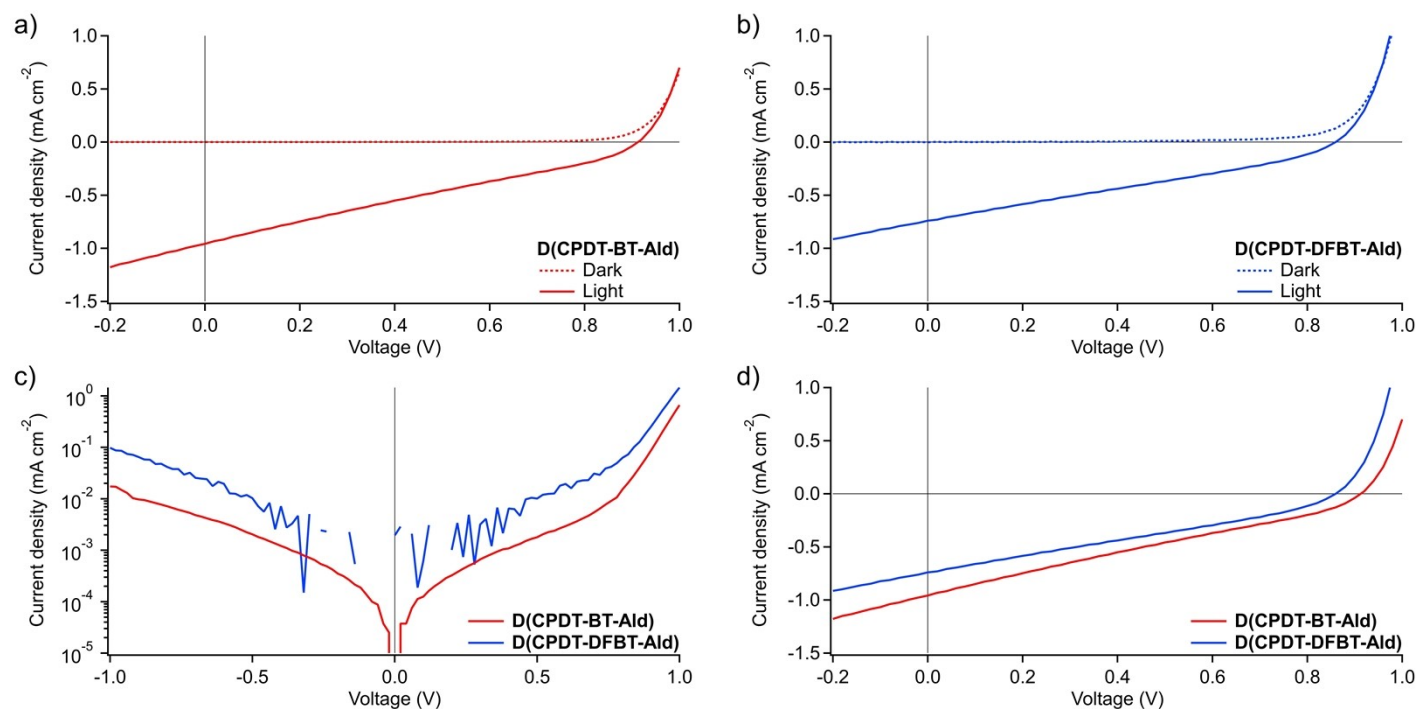

**Figure S35.** Current density versus voltage ( $J$ - $V$ ) characteristics in the dark and under illumination of  $100 \text{ mW cm}^{-2}$  for devices composed of **D(CPDT-BT-Ald)** (a) and **D(CPDT-DFBT-Ald)** (b), along with the comparison of the two dimers in semi-log  $J$ - $V$  in the dark (c) and under illumination (d).
